# Supplementary material for: A Cu-incorporated polymeric heterogeneous catalyst: exploring an expedient approach to construct amide bonds and extending its application to triazole hybrid amide synthesis
Source: Royal Society of Chemistry journal article supplement (doi:10.1039/d2nj04090e), 2023-01-01

## SUPPLEMENTARY INFORMATION

### **A Cu-incorporated polymeric heterogeneous catalyst: exploring an expedient approach to construct amide bonds and extending its application to triazole hybrid amide synthesis**

Sushmita Gajurel,<sup>a</sup> Fillip Kumar Sarkar,<sup>a</sup> Rajib Sarkar,<sup>a</sup> Lenida Kyndiah<sup>a</sup> and  
Amarta Kumar Pal<sup>a\*</sup>

*<sup>a</sup>Department of Chemistry, Centre for Advanced Studies, North-Eastern Hill University,  
Shillong-793022, Meghalaya, India.*

*E-mail: amartya\_pal22@yahoo.com, akpal@nehu.ac.in Tel: +91 364 2722606 Fax: +91 364  
2550076*

| <b>Table of content</b>                                                                                       | <b>Page No.</b> |
|---------------------------------------------------------------------------------------------------------------|-----------------|
| 1. TEM-EDX images of the polymeric copper catalyst                                                            | S2              |
| 2. GPC chromatogram of imidazole polymer                                                                      | S2-S3           |
| 3. Spectral data of the compounds (Intermediate <b>III</b> and <b>2a-5e</b> )                                 | S2 – S11        |
| 4. References                                                                                                 | S11             |
| 5. <sup>1</sup> H and <sup>13</sup> C NMR spectra of the polymer ( <b>I</b> ) and intermediate ( <b>III</b> ) | S11 – S13       |
| 6. <sup>1</sup> H and <sup>13</sup> C NMR spectra of the compounds ( <b>2a-5e</b> )                           | S14-S37         |

## 1. TEM-EDX images of the polymeric copper catalyst:

The TEM-EDX images of the polymeric copper complex is shown in **Figure 1**. The TEM-EDX analysis has been performed for three different areas of the catalyst. It can be seen that the presence of all the required elements i.e. C, N, O, S and Cu were successfully retained for all the analysed areas of the catalyst.

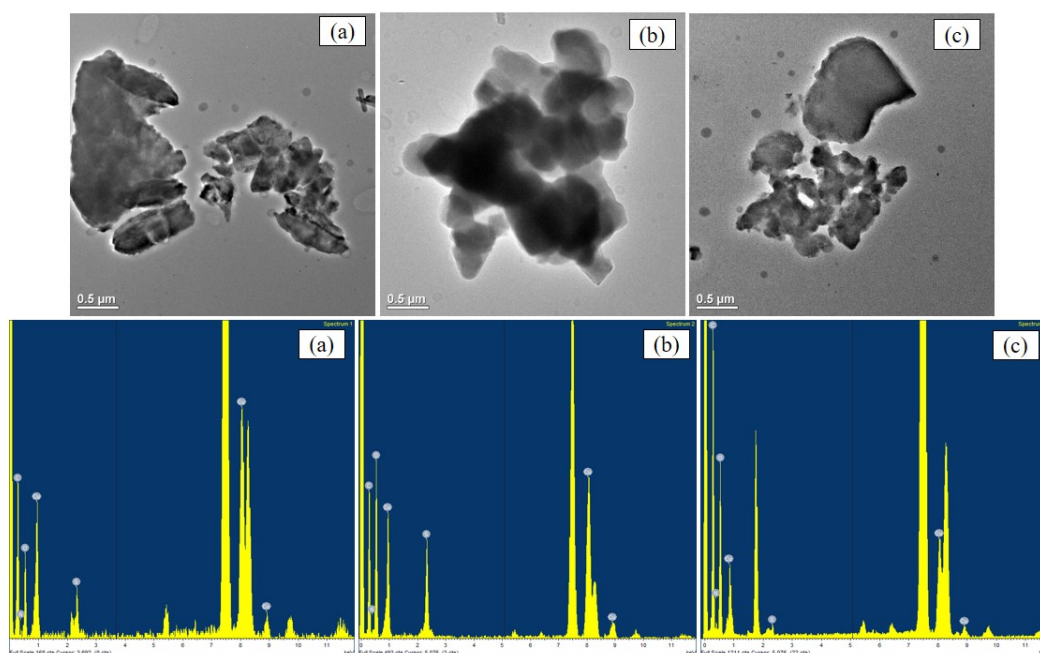

**Figure 1** TEM (a-c) and EDX (a-c) images of the polymeric copper catalyst.

## 2. GPC chromatogram of imidazole polymer

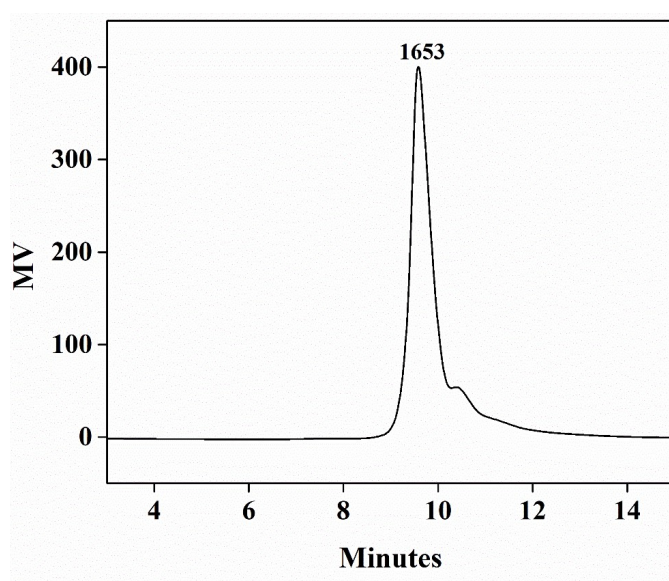

### GPC Results

|   | Retention Time (min) | % Area | Mn   | Mw   | MP   | Mz   | Mz+1 | Poly dispersity |
|---|----------------------|--------|------|------|------|------|------|-----------------|
| 1 | 9.585                | 100.00 | 1495 | 1599 | 1653 | 1708 | 1821 | 1.070101        |

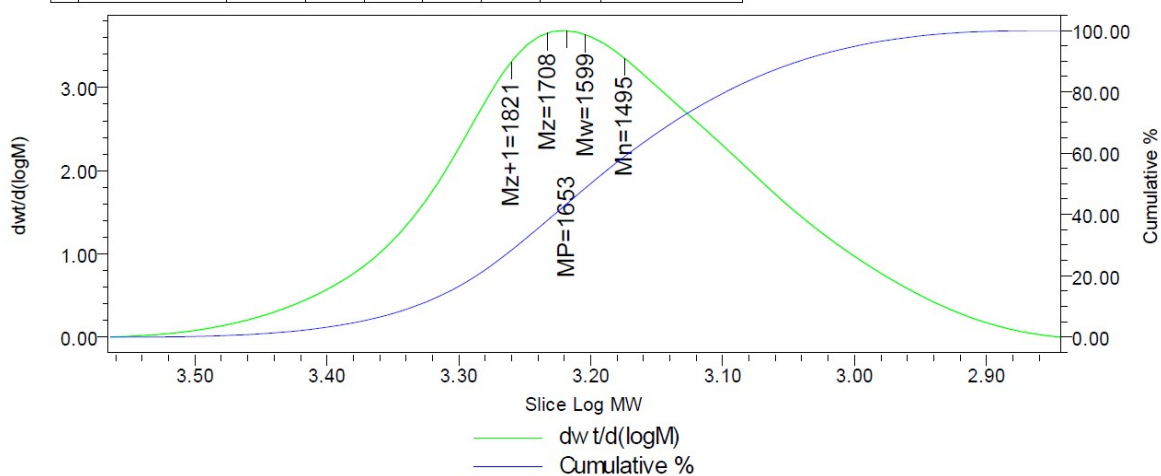

### 3. Spectral data of the compounds (Intermediate III and 2a-5e).

#### 4-Bromobenzaldehyde oxime<sup>1</sup>

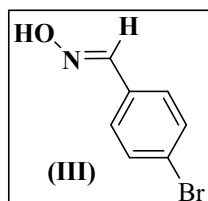

White solid. <sup>1</sup>H NMR (CDCl<sub>3</sub>, 400 MHz): δ = 8.1 (s, 1H), 7.55-7.53 (m, 2H), 7.48-7.45 (m, 2H). <sup>13</sup>C NMR (CDCl<sub>3</sub>, 100 MHz): δ = 149.4, 132.0, 130.9, 128.4, 124.2. Eluent: Ethyl acetate: Hexane (1.5:8.5), R<sub>f</sub> = 0.5

#### 1. Benzamide<sup>2-3</sup>

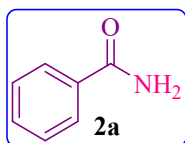

White solid. IR(KBr): 3369, 3172, 1659 cm<sup>-1</sup>. <sup>1</sup>H NMR (CDCl<sub>3</sub>, 400 MHz): δ = 8.03 (d, *J* = 7.6 Hz, 2H), 7.74 (t, *J* = 7.2 Hz, 1H), 7.65 (t, *J* = 7.4 Hz, 2H), 6.56 (s, 2H). <sup>13</sup>C NMR (CDCl<sub>3</sub>, 100 MHz): δ = 169.8, 133.4, 131.9, 128.6, 127.3. Eluent: Ethyl acetate: Hexane (5:5), R<sub>f</sub> = 0.5

#### 2. 4-bromobenzamide<sup>4</sup>

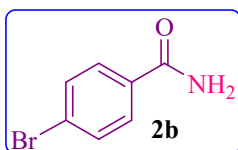

White solid. IR(KBr): 3361, 3176, 1656  $\text{cm}^{-1}$ .  $^1\text{H}$  NMR (DMSO- $d_6$ , 400 MHz):  $\delta = 8.03$  (s, 1H), 7.79 (d,  $J = 8.4$  Hz, 2H), 7.65 (d,  $J = 8.0$  Hz, 2H), 7.45 (s, 1H).  $^{13}\text{C}$  NMR ( $\text{CDCl}_3 + \text{DMSO-}d_6$ , 100 MHz):  $\delta = 168.2, 132.6, 131.2, 131.1, 129.29, 129.26, 125.8$ . Eluent: Ethyl acetate: Hexane (6:4),  $R_f = 0.5$

### 3. 4-chlorobenzamide<sup>5</sup>

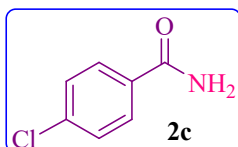

White solid. IR(KBr): 3367, 3177, 1657  $\text{cm}^{-1}$ .  $^1\text{H}$  NMR ( $\text{CDCl}_3$ , 400 MHz):  $\delta = 7.77$  (d,  $J = 8.8$  Hz, 2H), 7.44 (d,  $J = 8.4$  Hz, 2H), 6.06 (brs, 1H), 5.86 (brs, 1H).  $^{13}\text{C}$  NMR ( $\text{CDCl}_3$ , 100 MHz):  $\delta = 168.2, 138.3, 131.6, 128.9, 128.7$ . Eluent: Ethyl acetate: Hexane (5:5),  $R_f = 0.5$

### 4. 4-methoxybenzamide<sup>3,6</sup>

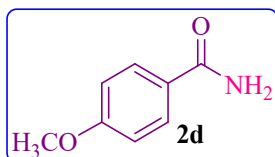

White solid. IR(KBr): 3389, 3168, 1645  $\text{cm}^{-1}$ .  $^1\text{H}$  NMR (DMSO- $d_6$ , 400 MHz):  $\delta = 7.86$ -7.83 (m, 3H), 7.17 (brs, 1H), 6.99-6.96 (m, 2H), 3.80 (s, 3H).  $^{13}\text{C}$  NMR ( $\text{CDCl}_3 + \text{DMSO-}d_6$ , 100 MHz):  $\delta = 168.5, 161.7, 129.1, 125.8, 113.0, 54.9$ . Eluent: Ethyl acetate: Hexane (5:5),  $R_f = 0.4$

### 5. 4-methylbenzamide<sup>3</sup>

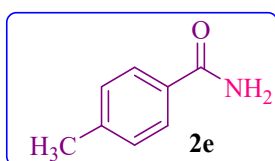

White solid. IR(KBr): 3341, 3164, 1670  $\text{cm}^{-1}$ .  $^1\text{H}$  NMR (DMSO- $d_6$ , 400 MHz):  $\delta = 7.95$  (brs, 1H), 7.83 (d,  $J = 8.0$  Hz, 2H), 7.33 (brs, 1H), 7.30 (d,  $J = 8.0$  Hz, 2H), 2.38 (s, 3H).  $^{13}\text{C}$  NMR ( $\text{CDCl}_3 + \text{DMSO-}d_6$ , 100 MHz):  $\delta = 168.7, 141.1, 130.6, 128.3, 127.1, 20.8$ . Eluent: Ethyl acetate: Hexane (5:5),  $R_f = 0.5$

### 6. 4-formylbenzamide<sup>7</sup>

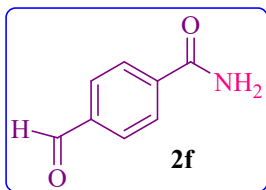

White solid. IR(KBr) 3352, 3192, 1695  $\text{cm}^{-1}$ .  $^1\text{H}$  NMR ( $\text{CDCl}_3 + \text{DMSO-d}_6$ , 400 MHz):  $\delta = 10.09$  (d,  $J = 4.4$  Hz, 1H), 8.10 (d,  $J = 7.6$  Hz, 2H), 7.95 (d,  $J = 7.6$  Hz, 3H), 7.08 (brs, 1H).  $^{13}\text{C}$  NMR ( $\text{CDCl}_3 + \text{DMSO-d}_6$ , 100 MHz):  $\delta = 191.9, 168.0, 139.4, 138.0, 129.4, 128.4$ . Eluent: Ethyl acetate: Hexane (4:6),  $R_f = 0.5$

### 7. 2-nitrobenzamide<sup>3</sup>

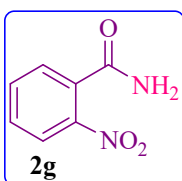

White solid. IR(KBr): 3361, 3176, 1657  $\text{cm}^{-1}$ .  $^1\text{H}$  NMR ( $\text{DMSO-d}_6$ , 400 MHz):  $\delta = 8.14$  (brs, 1H), 7.98 (d,  $J = 8.0$  Hz, 1H), 7.76 (t,  $J = 7.4$  Hz, 1H), 7.70 (brs, 1H), 7.67-7.60 (m, 2H), 7.63-7.60 (m, 1H).  $^{13}\text{C}$  NMR ( $\text{CDCl}_3 + \text{DMSO-d}_6$ , 100 MHz):  $\delta = 168.2, 133.3, 133.1, 130.2, 129.0, 124.0$ . Eluent: Ethyl acetate: Hexane (5:5),  $R_f = 0.4$

### 8. 2-bromobenzamide<sup>8</sup>

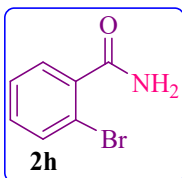

White solid. IR(KBr): 3359, 3181, 1648  $\text{cm}^{-1}$ .  $^1\text{H}$  NMR ( $\text{CDCl}_3$ , 400 MHz):  $\delta = 7.66$ -7.61 (m, 2H), 7.40 (t,  $J = 7.4$  Hz, 1H), 7.32-7.28 (m, 1H), 6.11 (brs, 2H).  $^{13}\text{C}$  NMR ( $\text{CDCl}_3$ , 100 MHz):  $\delta = 168.9, 136.5, 133.5, 131.7, 129.9, 127.6, 119.1$ . Eluent: Ethyl acetate: Hexane (6:4),  $R_f = 0.5$

### 9. 2-chlorobenzamide<sup>6</sup>

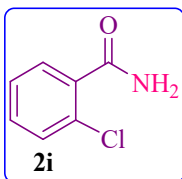

White solid. IR(KBr): 3360, 3179, 1650  $\text{cm}^{-1}$ .  $^1\text{H}$  NMR ( $\text{CDCl}_3$  +  $\text{DMSO-d}_6$ , 400 MHz):  $\delta$  = 7.45 (d,  $J$  = 6.8 Hz, 1H), 7.28-7.12 (m, 3H), 6.85 (brs, 1H), 6.67 (brs, 1H).  $^{13}\text{C}$  NMR ( $\text{CDCl}_3$  +  $\text{DMSO-d}_6$ , 100 MHz):  $\delta$  = 168.5, 134.7, 131.3, 130.6, 130.1, 129.9, 126.9. Eluent: Ethyl acetate: Hexane (6:4),  $R_f$  = 0.4

#### 10. 3-nitrobenzamide<sup>6</sup>

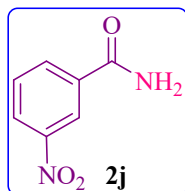

White solid. IR(KBr): 3450, 3341, 1690  $\text{cm}^{-1}$ .  $^1\text{H}$  NMR ( $\text{CDCl}_3$  +  $\text{DMSO-d}_6$ , 400 MHz):  $\delta$  = 8.68 (s, 1H), 8.19 (t,  $J$  = 8.8 Hz, 2H), 7.84 (brs, 1H), 7.52-7.47 (m, 1H), 6.50 (brs, 1H).  $^{13}\text{C}$  NMR ( $\text{CDCl}_3$  +  $\text{DMSO-d}_6$ , 100 MHz):  $\delta$  = 166.9, 148.0, 135.4, 133.9, 129.4, 125.9, 122.7. Eluent: Ethyl acetate: Hexane (6:4),  $R_f$  = 0.4

#### 11. 3-chlorobenzamide<sup>9</sup>

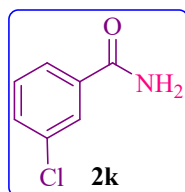

White solid. IR(KBr): 3359, 3178, 1658  $\text{cm}^{-1}$ .  $^1\text{H}$  NMR ( $\text{CDCl}_3$  +  $\text{DMSO-d}_6$ , 400 MHz):  $\delta$  = 7.09 (s, 1H), 7.00-6.96 (m, 2H), 6.62 (d,  $J$  = 7.6 Hz, 1H), 6.55-6.51 (m, 1H), 6.03 (brs, 1H).  $^{13}\text{C}$  NMR ( $\text{CDCl}_3$  +  $\text{DMSO-d}_6$ , 100 MHz):  $\delta$  = 167.3, 135.4, 133.4, 130.7, 129.1, 127.3, 125.5. Eluent: Ethyl acetate: Hexane (6:4),  $R_f$  = 0.5

#### 12. 4-chloro-3-nitro-benzamide<sup>10</sup>

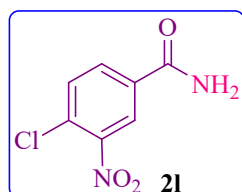

White solid. IR(KBr) 3374, 3190, 1665  $\text{cm}^{-1}$ .  $^1\text{H}$  NMR ( $\text{CDCl}_3$  +  $\text{DMSO-d}_6$ , 400 MHz):  $\delta$  = 8.42 (d,  $J$  = 2.4 Hz, 1H), 8.20-8.17 (dd,  $J$  = 2.6,  $J$  = 8.6 Hz, 1H), 7.62 (d,  $J$  = 8.8 Hz, 1H), 7.52

(brs, 1H), 7.12 (brs, 1H).  $^{13}\text{C}$  NMR ( $\text{CDCl}_3 + \text{DMSO-d}_6$ , 100 MHz):  $\delta = 166.4, 145.9, 137.7, 136.8, 131.1, 125.0, 124.3$ . Eluent: Ethyl acetate: Hexane (6:4),  $R_f = 0.4$

### 13. Cinnamide<sup>10</sup>

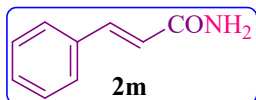

White solid. IR(KBr): 3380, 3165, 1668  $\text{cm}^{-1}$ .  $^1\text{H}$  NMR ( $\text{CDCl}_3 + \text{DMSO-d}_6$ , 400 MHz):  $\delta = 7.51\text{-}7.46$  (m, 4H), 7.39-7.32 (m, 3H), 6.87 (brs, 1H), 6.65 (d,  $J = 15.6$  Hz, 1H).  $^{13}\text{C}$  NMR ( $\text{CDCl}_3 + \text{DMSO-d}_6$ , 100 MHz):  $\delta = 167.5, 139.8, 135.1, 129.5, 129.0, 127.7, 122.2$ . Eluent: Ethyl acetate: Hexane (6:4),  $R_f = 0.5$

### 14. (*E*)-3-(4-methoxyphenyl)acrylamide

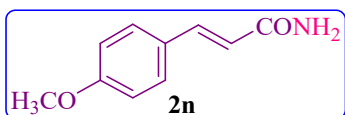

Yellow solid. IR(KBr): 3442, 2928, 1662  $\text{cm}^{-1}$ .  $^1\text{H}$  NMR ( $\text{CDCl}_3 + \text{DMSO-d}_6$ , 400 MHz):  $\delta = 7.46\text{-}7.38$  (m, 4H), 6.92 (d,  $J = 7.6$  Hz, 2H), 6.86 (brs, 1H), 6.49 (d,  $J = 15.6$  Hz, 1H), 3.81 (s, 3H).  $^{13}\text{C}$  NMR ( $\text{CDCl}_3 + \text{DMSO-d}_6$ , 100 MHz):  $\delta = 167.7, 160.6, 139.4, 129.2, 127.7, 119.7, 114.4, 55.4$ . HRMS (ESI):  $m/z$  calcd for  $\text{C}_{10}\text{H}_{11}\text{NO}_2$  [ $\text{M} + \text{H}$ ] $^+$  178.0868, found: 178.0859. Eluent: Ethyl acetate: Hexane (6:4),  $R_f = 0.4$

### 15. (*E*)-3-(4-nitrophenyl)acrylamide

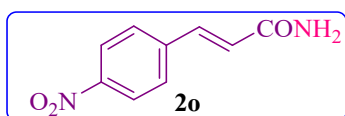

Yellow solid. IR(KBr): 3430, 2923, 1667  $\text{cm}^{-1}$ .  $^1\text{H}$  NMR ( $\text{CDCl}_3 + \text{DMSO-d}_6$ , 400 MHz):  $\delta = 8.24$  (d,  $J = 8.0$  Hz, 2H), 7.77 (brs, 1H), 7.71 (d,  $J = 8.4$  Hz, 1H), 7.60 (d,  $J = 16.0$  Hz, 1H), 7.54 (brs, 1H), 6.83 (d,  $J = 16.0$  Hz, 2H).  $^{13}\text{C}$  NMR ( $\text{CDCl}_3 + \text{DMSO-d}_6$ , 100 MHz):  $\delta = 166.6, 147.5, 141.2, 137.5, 128.0, 125.3, 123.6$ . HRMS (ESI):  $m/z$  calcd for  $\text{C}_9\text{H}_8\text{N}_2\text{O}_3$  [ $\text{M} + \text{H}$ ] $^+$  193.0613, found: 193.0597. Eluent: Ethyl acetate: Hexane (6:4),  $R_f = 0.4$

## 16. Picolinamide<sup>6</sup>

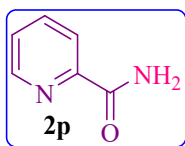

White solid. IR(KBr): 3182, 3208, 1682  $\text{cm}^{-1}$ .  $^1\text{H}$  NMR ( $\text{CDCl}_3$ , 400 MHz):  $\delta = 8.66$  (d,  $J = 4.4$  Hz, 1H), 8.30 (d,  $J = 8.0$  Hz, 1H), 8.02 (brs, 1H), 7.95-7.91 (m, 1H), 7.54-7.51 (m, 1H), 6.72 (brs, 1H).  $^{13}\text{C}$  NMR ( $\text{CDCl}_3$ , 100 MHz):  $\delta = 167.1, 149.5, 148.3, 137.2, 126.4, 122.3$ . Eluent: Ethyl acetate: Hexane (6:4),  $R_f = 0.5$

## 17. Furan-2-carboxamide<sup>11</sup>

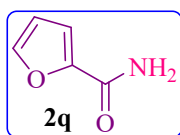

White solid. IR(KBr): 3161, 3078, 1648  $\text{cm}^{-1}$ .  $^1\text{H}$  NMR ( $\text{CDCl}_3 + \text{DMSO-d}_6$ , 400 MHz):  $\delta = 7.51$  (d,  $J = 9.2$  Hz, 1H), 7.13-7.10 (m, 1H), 6.97 (brs, 1H), 6.88 (brs, 1H), 6.51-6.48 (m, 1H).  $^{13}\text{C}$  NMR ( $\text{CDCl}_3 + \text{DMSO-d}_6$ , 100 MHz):  $\delta = 160.4, 147.7, 144.3, 114.4, 112.0$ . Eluent: Ethyl acetate: Hexane (6:4),  $R_f = 0.4$

## 18. 2-naphthamide<sup>6</sup>

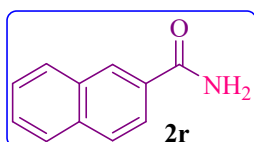

White solid. IR(KBr): 3378, 3196, 1656  $\text{cm}^{-1}$ .  $^1\text{H}$  NMR ( $\text{CDCl}_3 + \text{DMSO-d}_6$ , 400 MHz):  $\delta = 8.40$  (s, 1H), 7.92 (d,  $J = 8.4$  Hz, 1H), 7.87 (d,  $J = 7.6$  Hz, 1H), 7.82 (d,  $J = 8.4$  Hz, 3H), 7.51-7.44 (m, 2H), 6.74 (brs, 1H).  $^{13}\text{C}$  NMR ( $\text{CDCl}_3 + \text{DMSO-d}_6$ , 100 MHz):  $\delta = 168.6, 134.0, 131.8, 130.7, 128.3, 127.6, 127.3, 127.0, 126.9, 125.9, 123.8$ . Eluent: Ethyl acetate: Hexane (5:5),  $R_f = 0.5$

## 19. Terephthalamide<sup>10</sup>

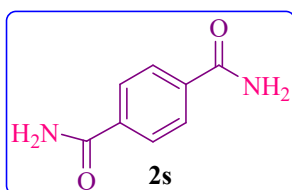



White solid. IR(KBr): 3449, 1642  $\text{cm}^{-1}$ .  $^1\text{H}$  NMR ( $\text{CDCl}_3 + \text{DMSO-d}_6$ , 400 MHz):  $\delta = 11.08$  (s, 2H), 8.09-8.07 (m, 2H), 7.583-7.571 (m, 4H).  $^{13}\text{C}$  NMR ( $\text{CDCl}_3 + \text{DMSO-d}_6$ , 100 MHz):  $\delta = 147.9, 133.9, 126.8$ . Eluent: Ethyl acetate: Hexane (6:4),  $R_f = 0.5$

## 20. 4-((1-(4-nitrophenyl)-1H-1,2,3-triazol-4-yl)methoxy)benzamide

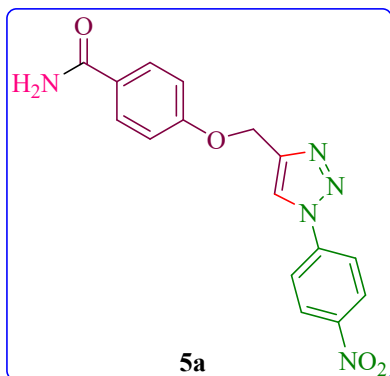

Yellow solid. IR(KBr): 3642, 3425, 3223, 1599, 1294, 1246, 750  $\text{cm}^{-1}$ . m.p = 192-196  $^{\circ}\text{C}$ .  $^1\text{H}$  NMR ( $\text{CDCl}_3 + \text{DMSO-d}_6$ , 400 MHz):  $\delta = 7.48$  (d,  $J = 8.4$  Hz, 1H), 7.17 (s, 2H), 6.91 (s, 2H), 6.80 (d,  $J = 5.6$  Hz, 1H), 6.43 (d,  $J = 8.8$  Hz, 1H), 6.29 (s, 2H), 5.78 (s, 2H), 4.16 (d,  $J = 7.2$  Hz, 1H), 4.07 (d,  $J = 5.6$  Hz, 1H).  $^{13}\text{C}$  NMR ( $\text{CDCl}_3 + \text{DMSO-d}_6$ , 100 MHz):  $\delta = 157.9, 146.6, 145.9, 143.7, 140.1, 127.0, 125.4, 124.4, 121.7, 119.6, 113.9, 60.4$ . HRMS (ESI):  $m/z$  calcd for  $\text{C}_{16}\text{H}_{13}\text{N}_5\text{O}_4$  [ $\text{M} + \text{H}$ ] $^+$  340.1046, found: 340.0854. Eluent: Ethyl acetate: Hexane (8:2),  $R_f = 0.4$

## 21. 4-((1-(4-methoxyphenyl)-1H-1,2,3-triazol-4-yl)methoxy)benzamide

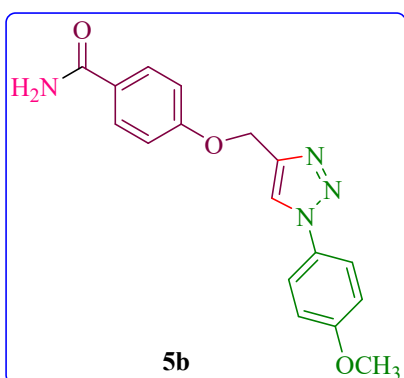

Yellow solid. IR(KBr): 3164, 2881, 1606, 1514, 1248, 959, 829  $\text{cm}^{-1}$ . m.p = 180-182  $^{\circ}\text{C}$ .  $^1\text{H}$  NMR ( $\text{CDCl}_3 + \text{DMSO-d}_6$ , 400 MHz):  $\delta = 10.59$  (brs, 1H), 8.17 (s, 1H), 7.94 (s, 1H), 7.60 (t,  $J = 8.4$  Hz, 2H), 7.44 (d,  $J = 8.4$  Hz, 2H), 6.96 (t,  $J = 8.0$  Hz, 4H), 5.18 (s, 2H), 3.78 (s, 3H).  $^{13}\text{C}$  NMR ( $\text{CDCl}_3 + \text{DMSO-d}_6$ , 100 MHz):  $\delta = 159.3, 158.6, 147.5, 143.4, 129.8, 127.6, 125.8,$

121.6, 121.4, 114.4, 114.3, 61.2, 55.1. HRMS (ESI):  $m/z$  calcd for  $C_{17}H_{16}N_4O_3$   $[M+ H]^+$ : 325.1301, found: 325.1281. Eluent: Ethyl acetate: Hexane (8:2),  $R_f$  = 0.4

#### 22. 4-((1-(*p*-tolyl)-1*H*-1,2,3-triazol-4-yl)methoxy)benzamide

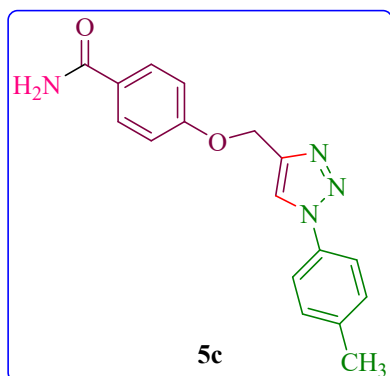

Yellow solid. IR(KBr): 3169, 2781, 1609, 1511, 1254, 954, 833, 729  $cm^{-1}$ . m.p = 185-187 °C.  $^1H$  NMR ( $CDCl_3$  +  $DMSO-d_6$ , 400 MHz):  $\delta$  = 10.74 (brs, 1H), 8.45 (d,  $J$  = 3.6 Hz, 1H), 7.99-7.98 (m, 1H), 7.66 (d,  $J$  = 8.0 Hz, 2H), 7.49-7.47 (m, 2H), 7.31 (s, 2H), 7.00-6.98 (m, 2H), 5.24-5.22 (m, 2H), 2.39 (t,  $J$  = 2.8 Hz, 3H).  $^{13}C$  NMR ( $CDCl_3$  +  $DMSO-d_6$ , 100 MHz):  $\delta$  = 157.9, 146.6, 142.7, 137.5, 133.4, 129.0, 126.8, 125.1, 120.9, 119.1, 113.7, 60.4, 19.8. HRMS (ESI):  $m/z$  calcd for  $C_{17}H_{16}N_4O_2$   $[M+ H]^+$ : 309.1352, found: 309.1324. Eluent: Ethyl acetate: Hexane (8:2),  $R_f$  = 0.4

#### 23. 4-((1-(3,5-dimethoxyphenyl)-1*H*-1,2,3-triazol-4-yl)methoxy)benzamide

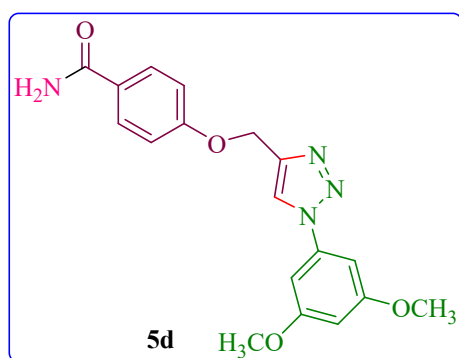

White solid. IR(KBr): 3438, 1730, 1514, 1256, 789  $cm^{-1}$ . m.p = 174-178 °C.  $^1H$  NMR ( $DMSO-d_6$ , 400 MHz):  $\delta$  = 11.01 (s, 1H), 9.30 (s, 1H), 8.70 (d,  $J$  = 1.6 Hz, 2H), 8.51 (t,  $J$  = 1.4 Hz, 1H), 8.08 (s, 1H), 7.57 (d,  $J$  = 8.8 Hz, 2H), 7.13 (d,  $J$  = 8.8 Hz, 2H), 5.29 (s, 2H), 3.95 (s, 6H).  $^{13}C$  NMR ( $DMSO-d_6$ , 100 MHz):  $\delta$  = 164.9, 159.2, 148.0, 144.5, 137.6, 132.4, 128.3, 126.5, 124.8, 123.9, 115.4, 61.4, 53.3. Eluent: Ethyl acetate: Hexane (9:1),  $R_f$  = 0.4.

#### 24. 4-((1-(3,5-dibromophenyl)-1*H*-1,2,3-triazol-4-yl)methoxy)benzamide

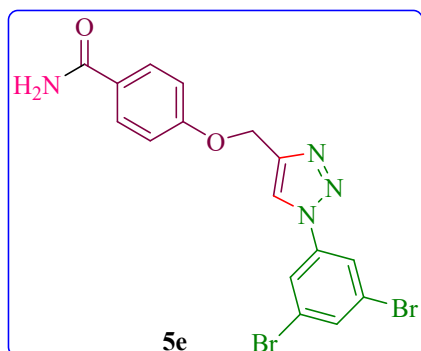

Pale yellow solid. IR(KBr): 3280, 3071, 1607, 1512, 1245, 746  $\text{cm}^{-1}$ . m.p = 148-152  $^{\circ}\text{C}$ .  $^1\text{H}$  NMR (DMSO- $d_6$ , 400 MHz):  $\delta$  = 11.01 (s, 1H), 9.09 (s, 1H), 8.24 (d,  $J$  = 1.6 Hz, 2H), 8.08 (s, 1H), 7.99 (t,  $J$  = 1.4 Hz, 1H), 7.56 (d,  $J$  = 8.8 Hz, 2H), 7.11 (d,  $J$  = 8.8 Hz, 2H), 5.27 (s, 2H).  $^{13}\text{C}$  NMR (DMSO- $d_6$ , 100 MHz):  $\delta$  = 159.1, 148.0, 144.4, 138.7, 133.9, 128.3, 126.5, 123.8, 123.7, 122.3, 115.4, 61.4. Eluent: Ethyl acetate: Hexane (9:1),  $R_f$  = 0.4

#### 4. References

1. R. S. Ramon, J. Bosson, S. D. Gonzalez, N. Marion and S. P. Nolan, *J. Org. Chem.*, 2010, **75**, 1197-1202.
2. X. N Feng, W Deng, Z. J. Liu and Z. J. Yao, *Inorg. Chem.*, 2020, **59**, 16582-16590.
3. F. Ziaee, M. Gholizadeh and S. M. Seyedi, *Appl Organometal Chem.*, 2017, e3925.
4. S. Rostamnia, N. Nouruzi, H. Xin and R. Luque, *Catal. Sci. Technol.*, 2015, **5**, 199-205.
5. G. E. Veitch, K. L. Bridgwood and S. V. Ley, *Org. Lett.*, 2008, **10**, 3623-3625.
6. M. A. Ali and T. Punniyamurthy, *Adv. Synth. Catal.*, 2010, **352**, 288-292.
7. A. S. Suresh, P. Baburajan and M. Ahmed, *Tetrahedron Lett.*, 2015, **56**, 4864-4867.
8. F. L. Yang, X. Zhu, D. K. Rao, X. N. Cao, K. Li, Y. Xu, X. Q Hao and M. P. Song, *R.Sc Adv.*, 2016, **6**, 37093-37098.
9. P. Marce, J. Lynch, A. J. Blacker and J. M. J. Williams, *Chem. Commun.*, 2016, **52**, 1436-1438.
10. R. Jamatia, A. Gupta, and A. K. Pal, *ACS Sustain. Chem. Eng.*, 2017, **5**, 7604-7614.
11. P. N. Borase, P. B. Thale and G. S. Shankarling, *ChemistrySelect* 2018, **3**, 5660-5666.

#### 5. $^1\text{H}$ and $^{13}\text{C}$ NMR spectra of Polymer (I) and intermediate (III)

**Note: The labelled peaks for  $^1\text{H}$  NMR spectroscopy are due to:**

**A = Grease, a =  $\text{CDCl}_3$ , B =  $\text{CDCl}_3+\text{H}_2\text{O}$ , C = impurities, E = DMSO- $d_6$ , F = DMSO- $d_6$ + $\text{H}_2\text{O}$ . The labelled peaks for  $^{13}\text{C}$  NMR spectroscopy are due to:**

**D =  $\text{CDCl}_3$ , G = DMSO- $d_6$**

# $^1\text{H}$ and $^{13}\text{C}$ NMR spectra of Polymer (I)

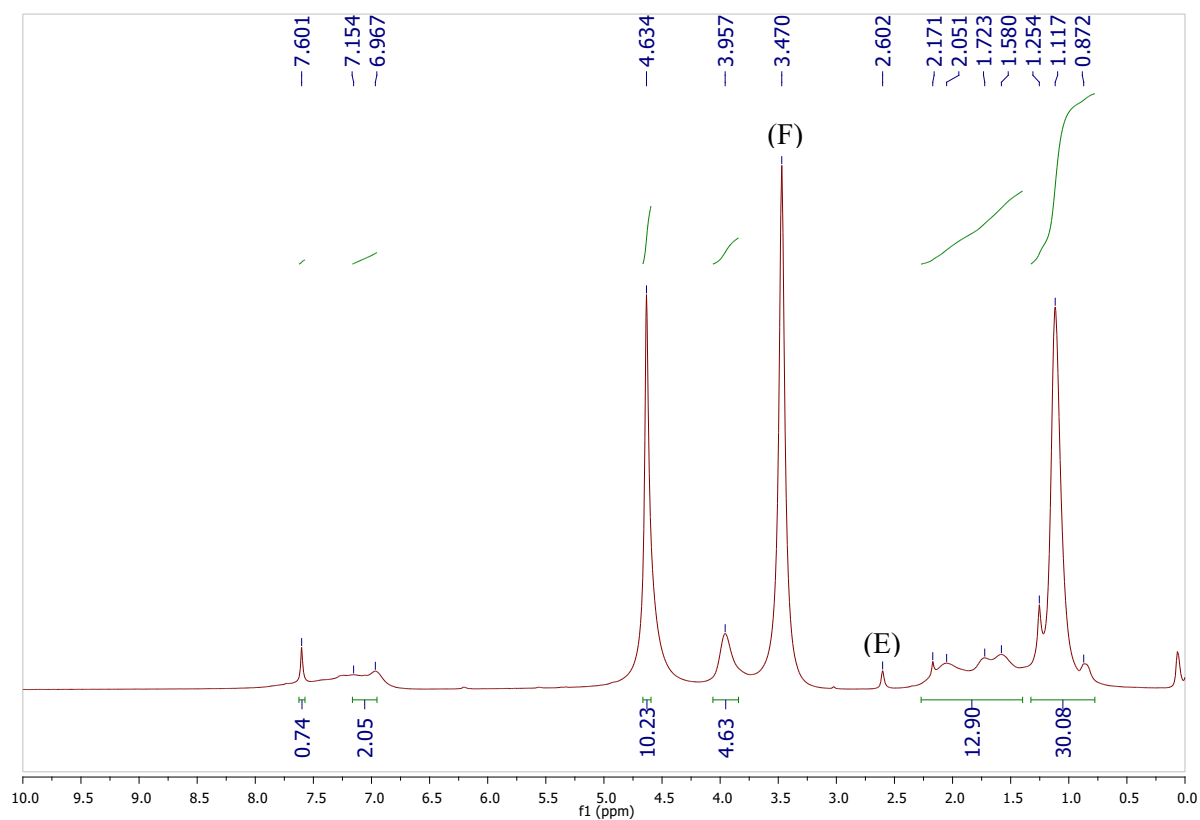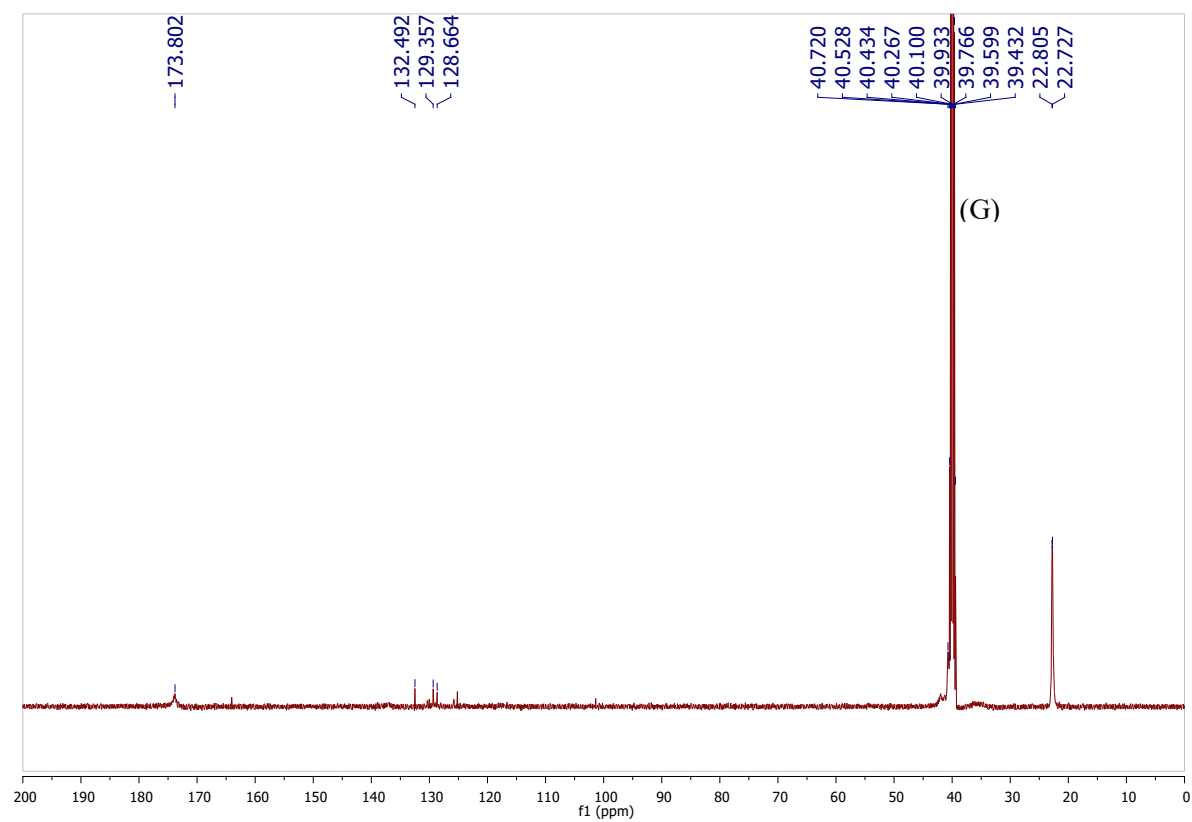

# <sup>1</sup>H and <sup>13</sup>C NMR spectra of intermediate (III)

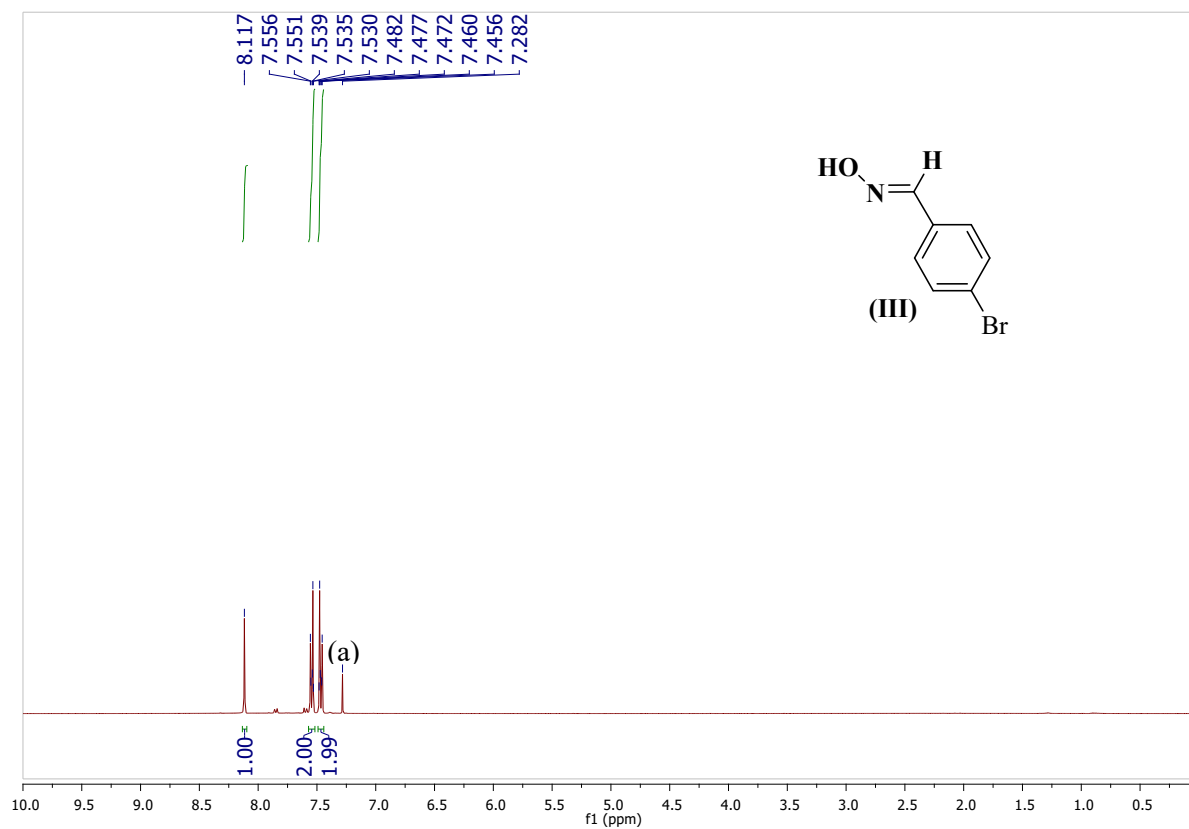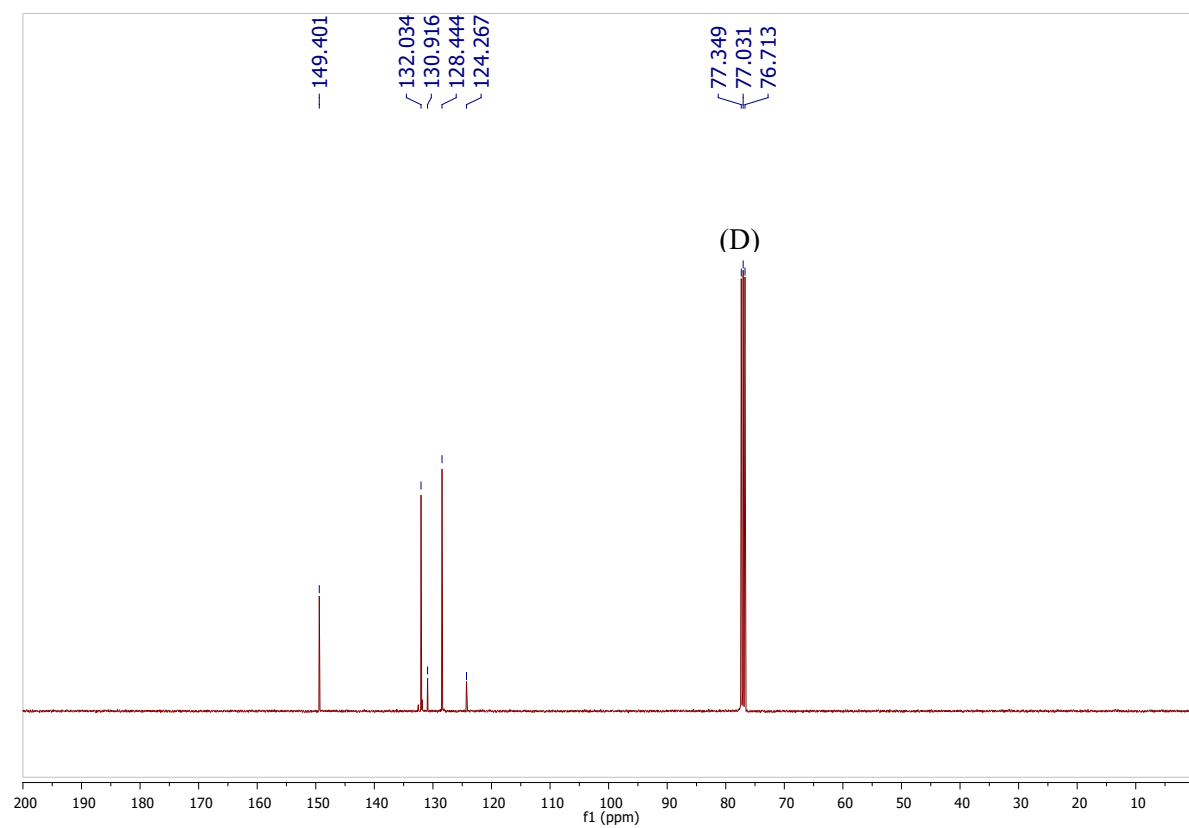

## 6. <sup>1</sup>H and <sup>13</sup>C NMR spectra of compounds (2a-5e)

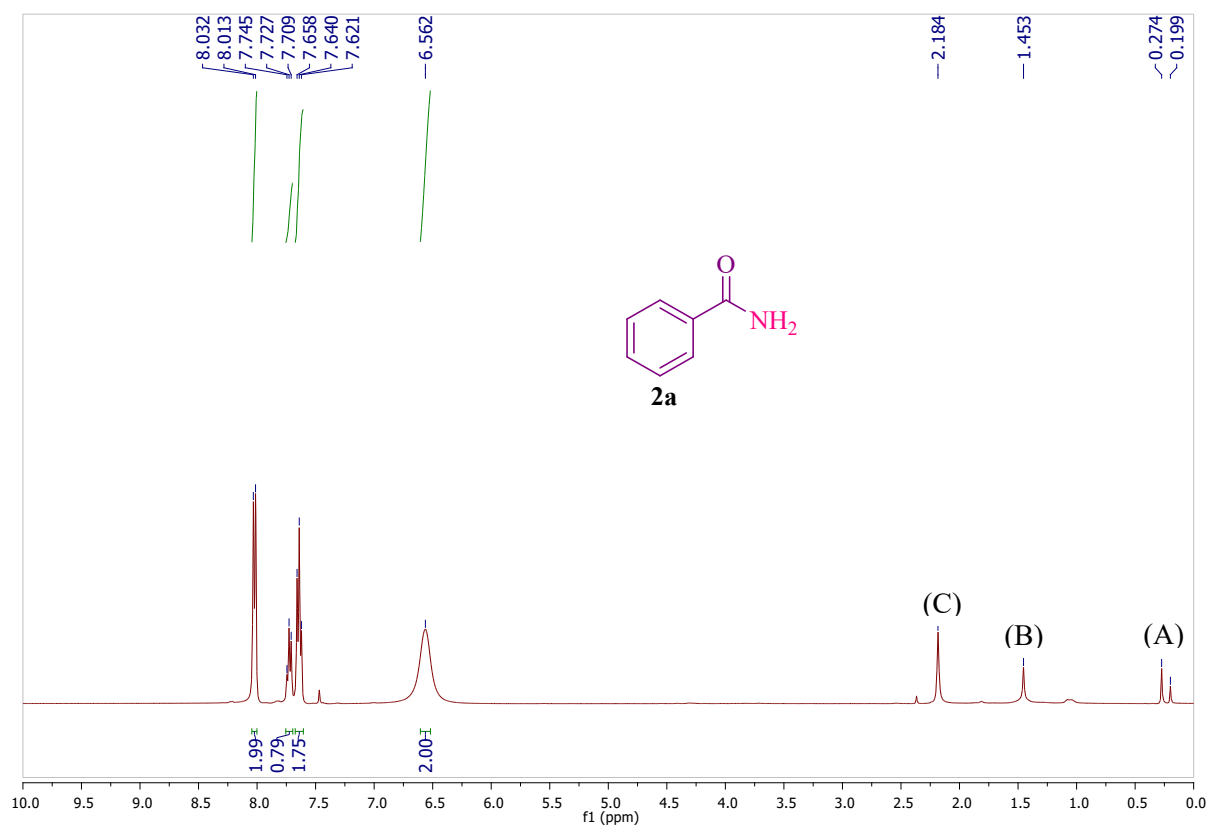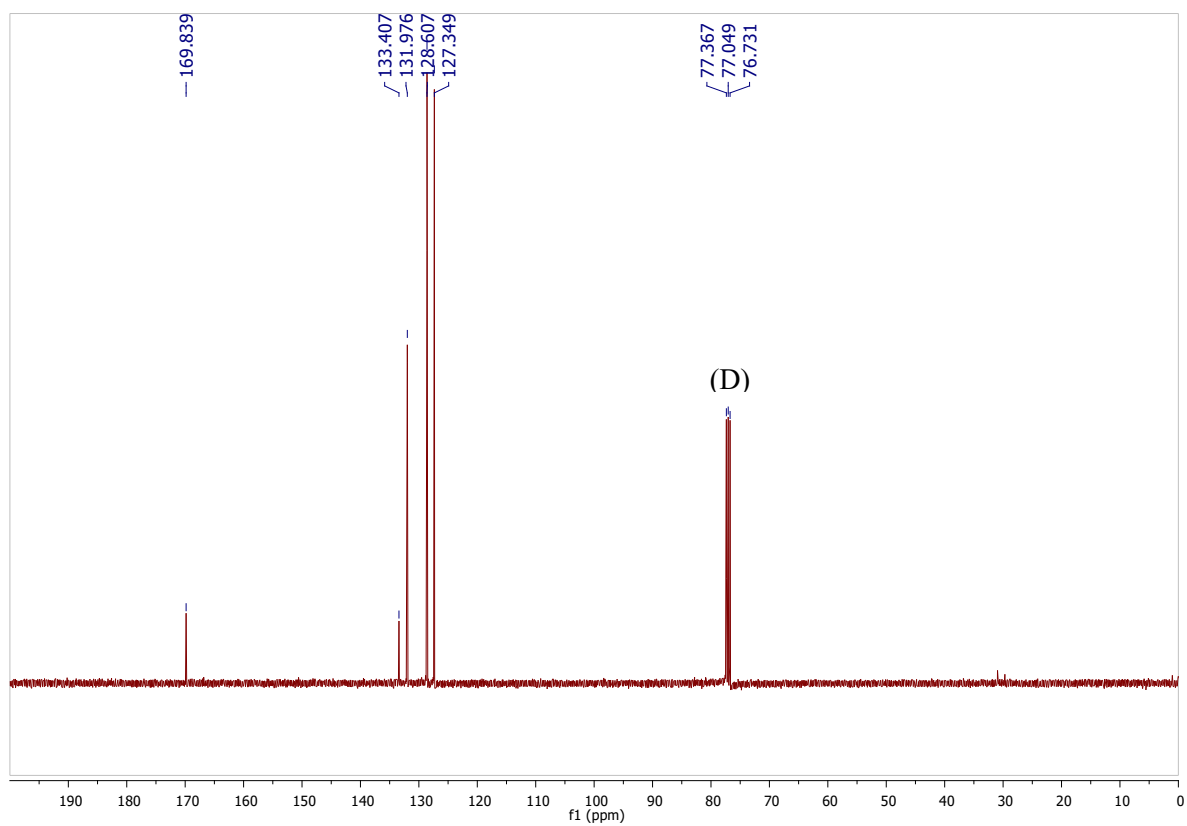

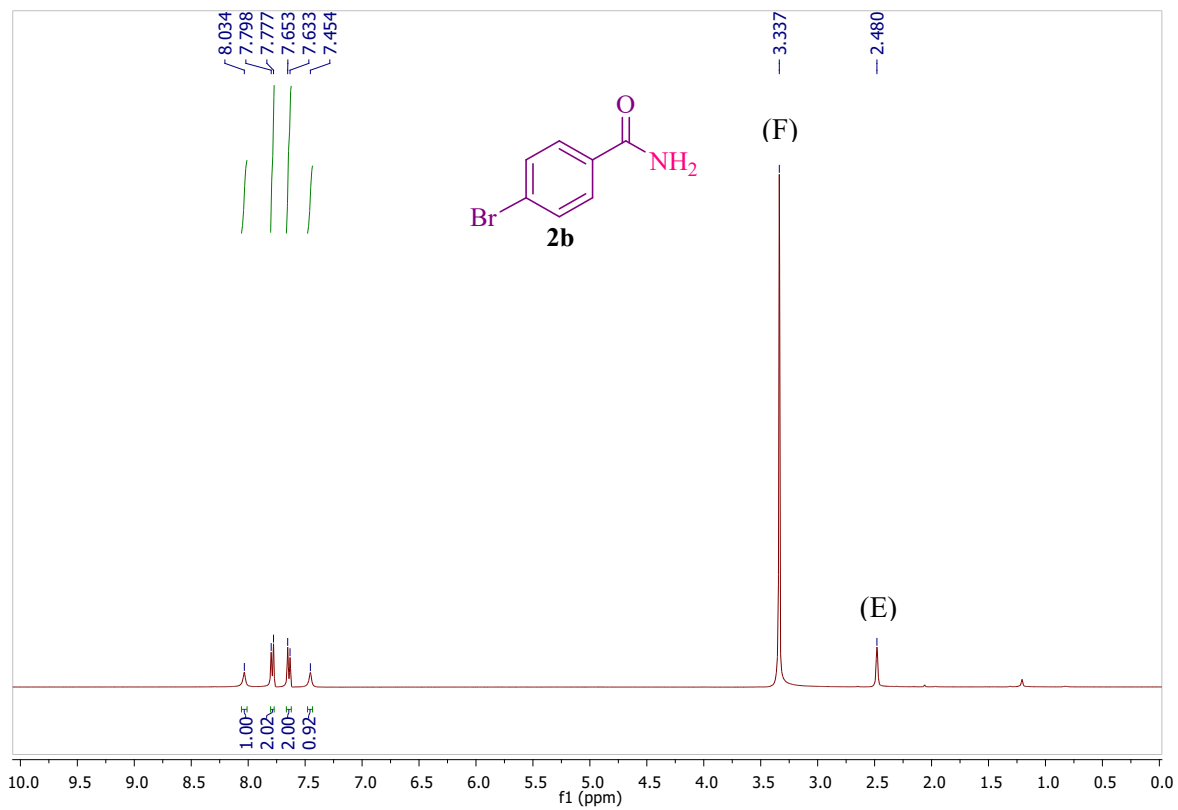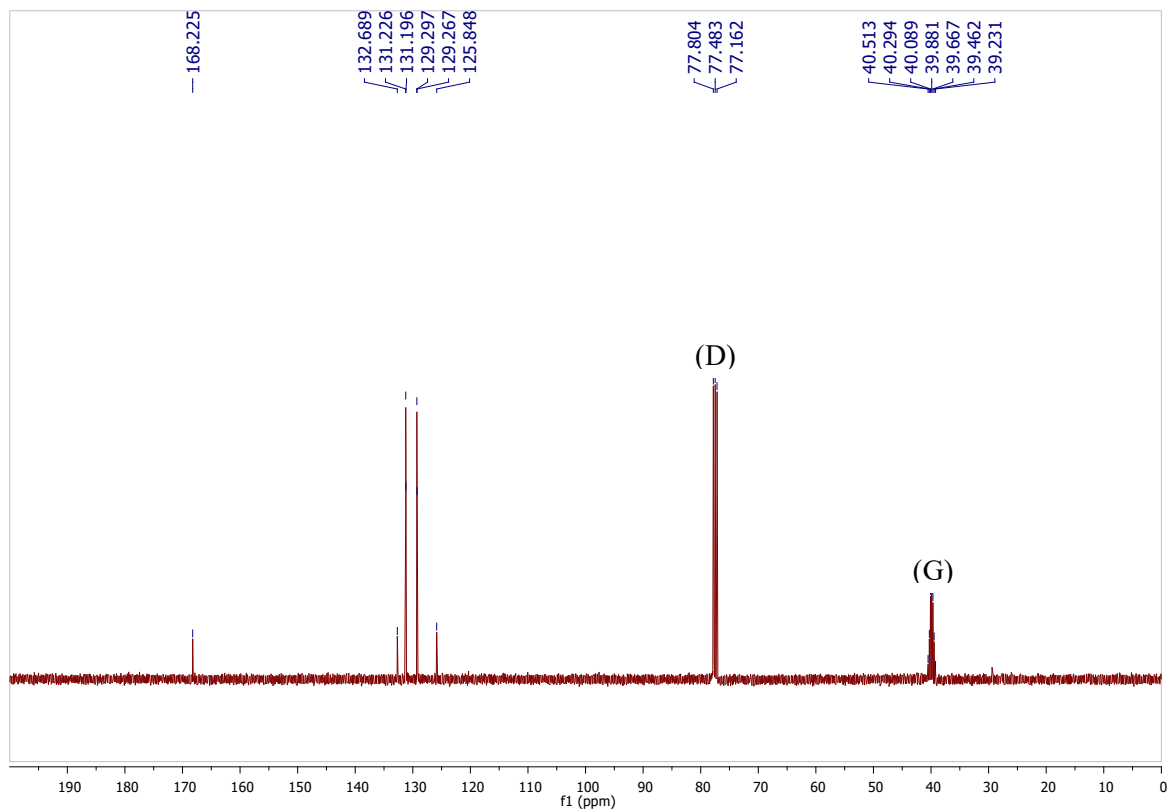

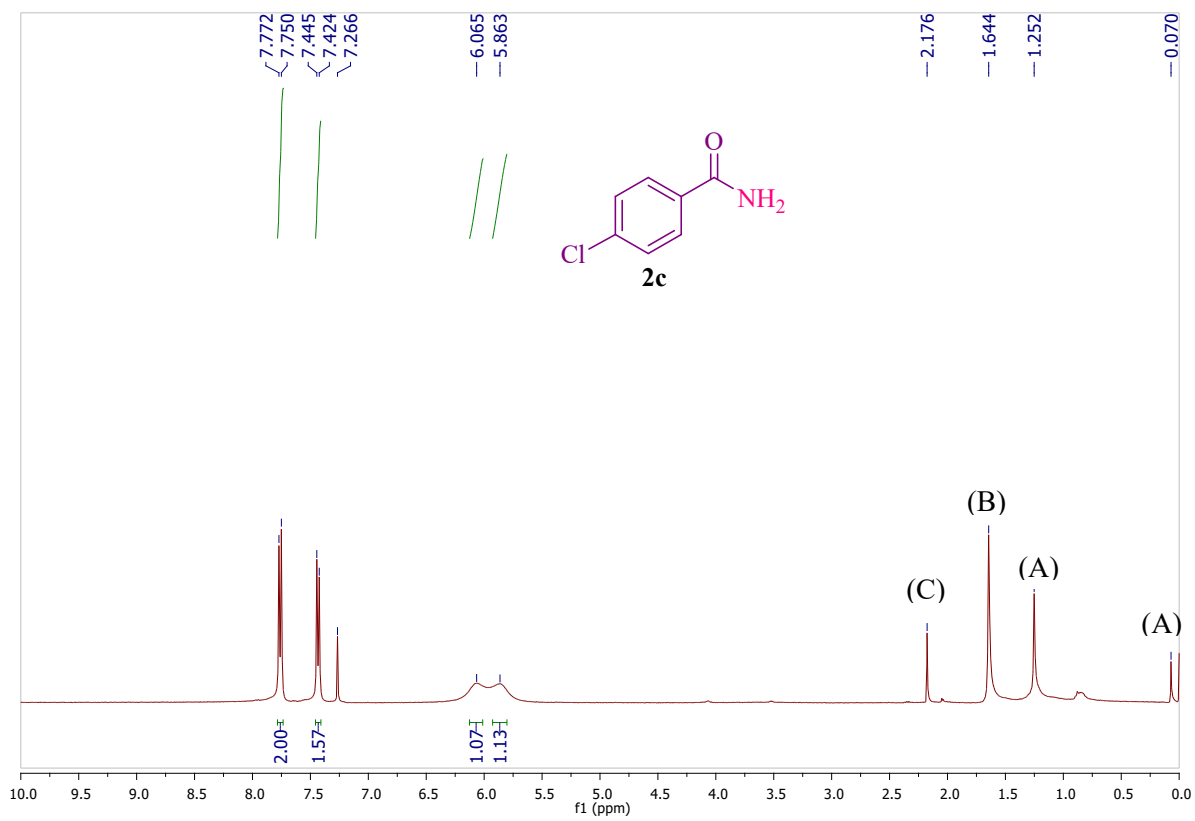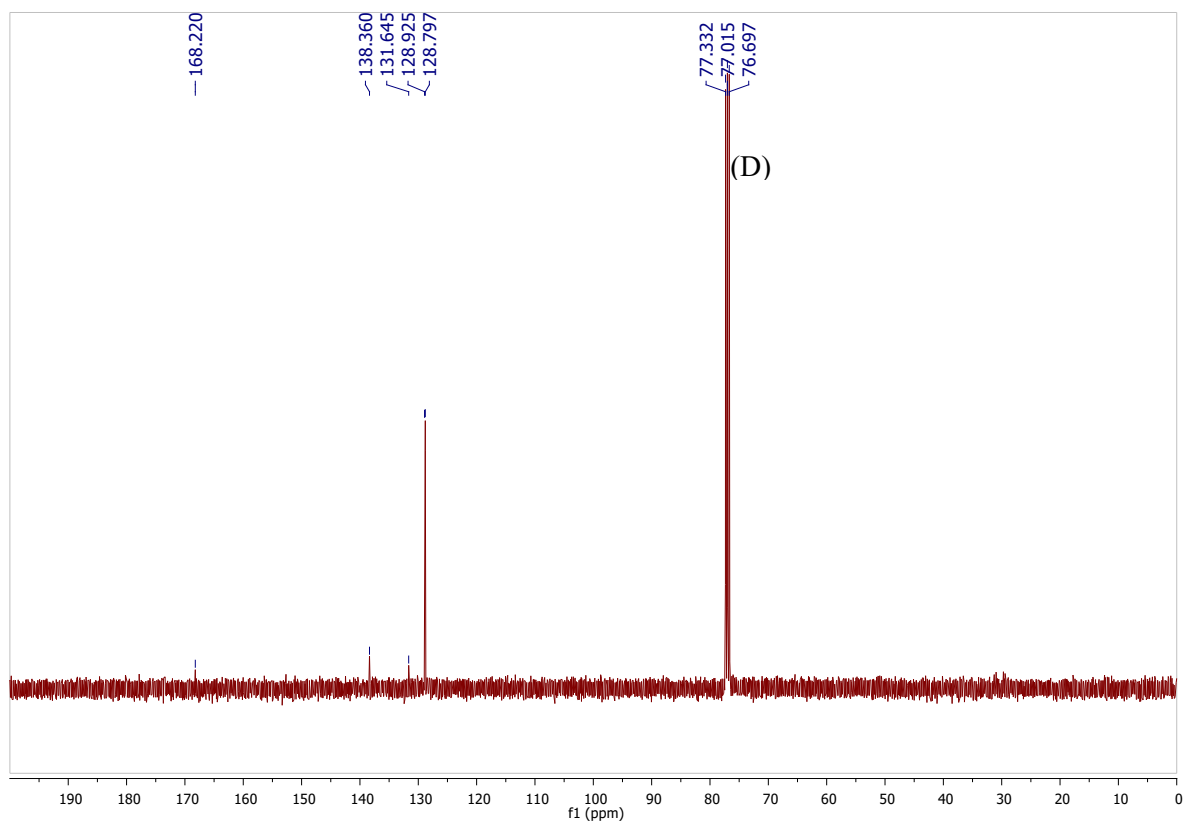



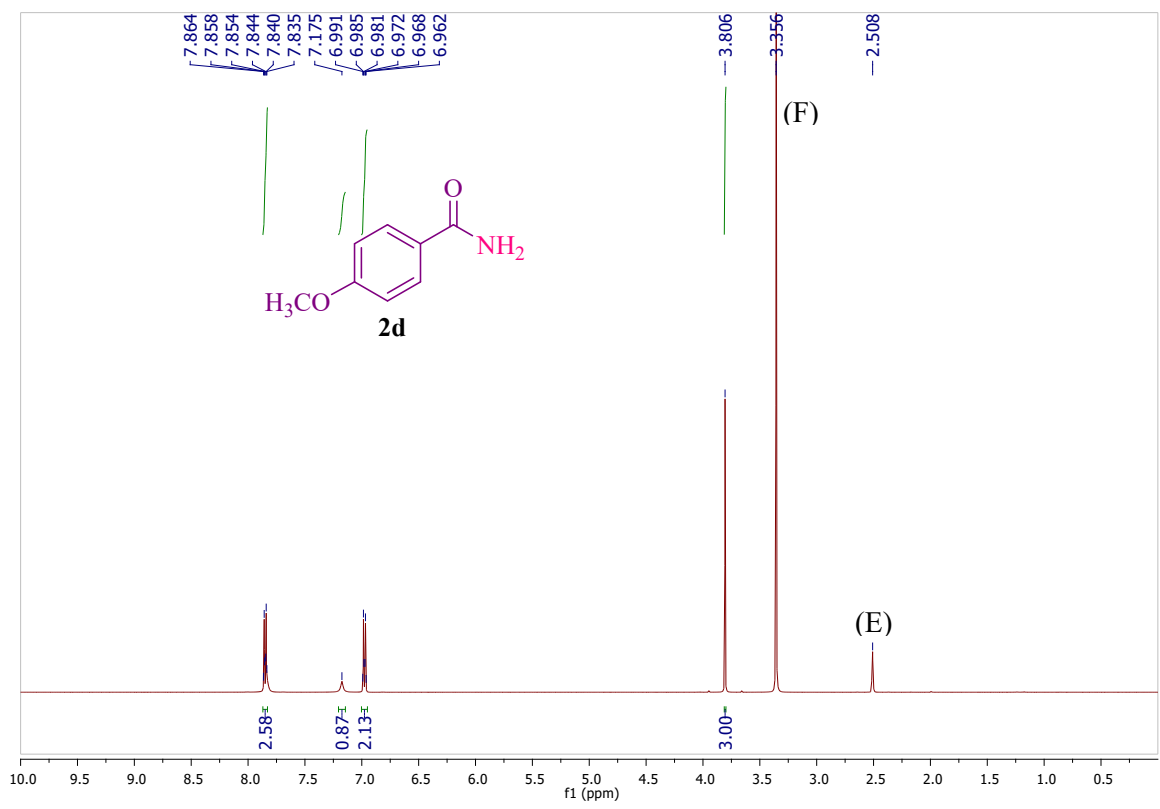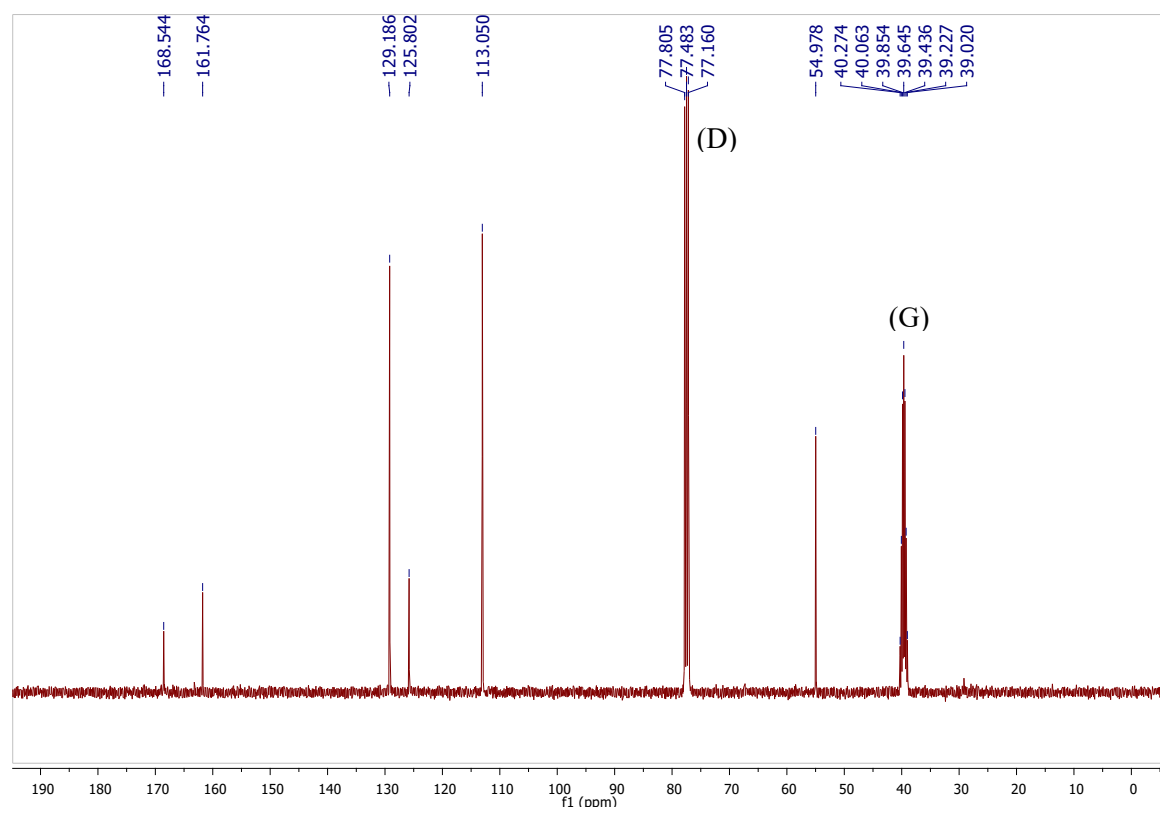

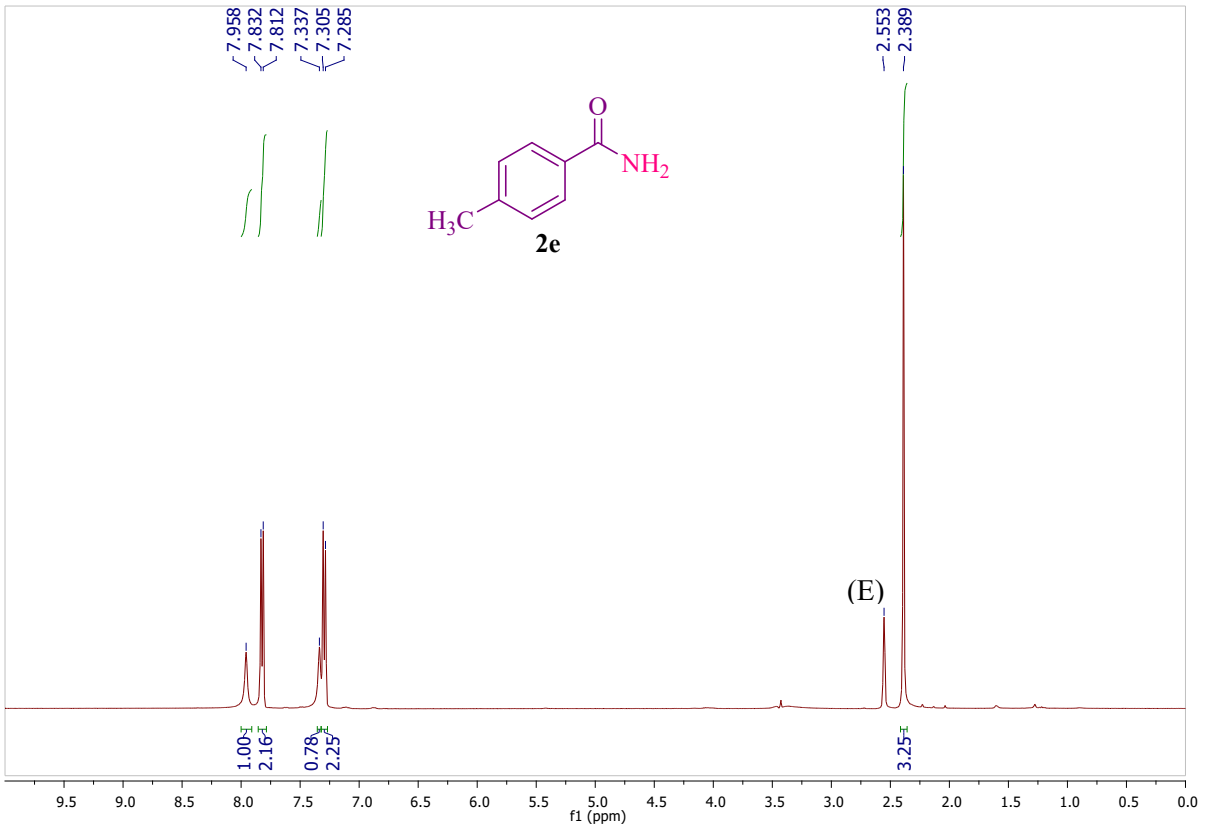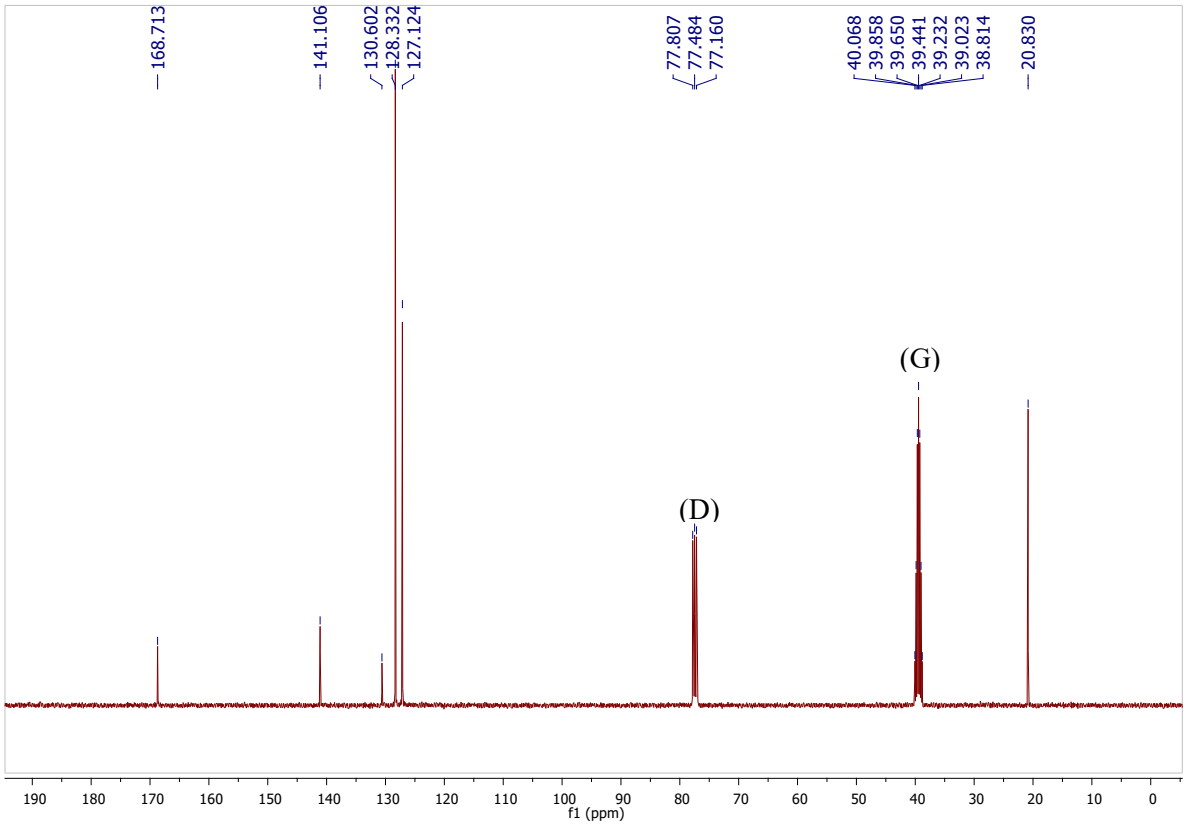

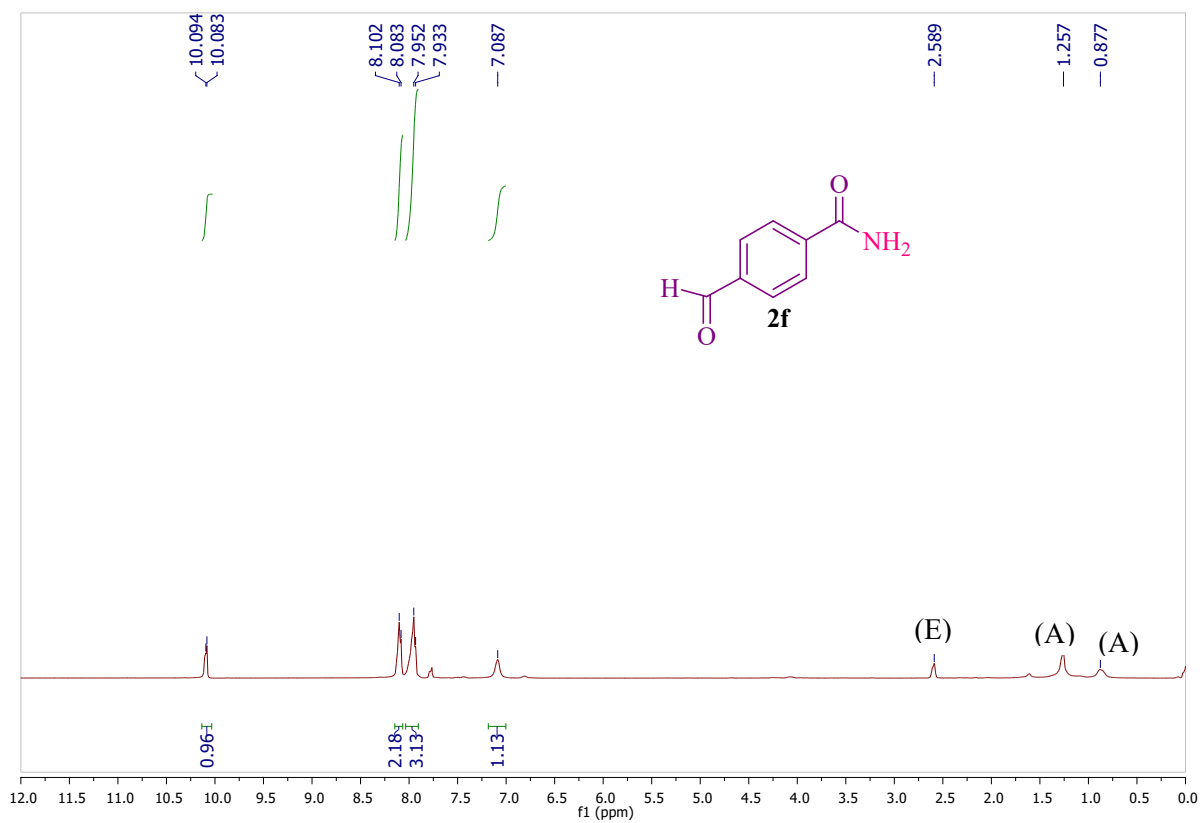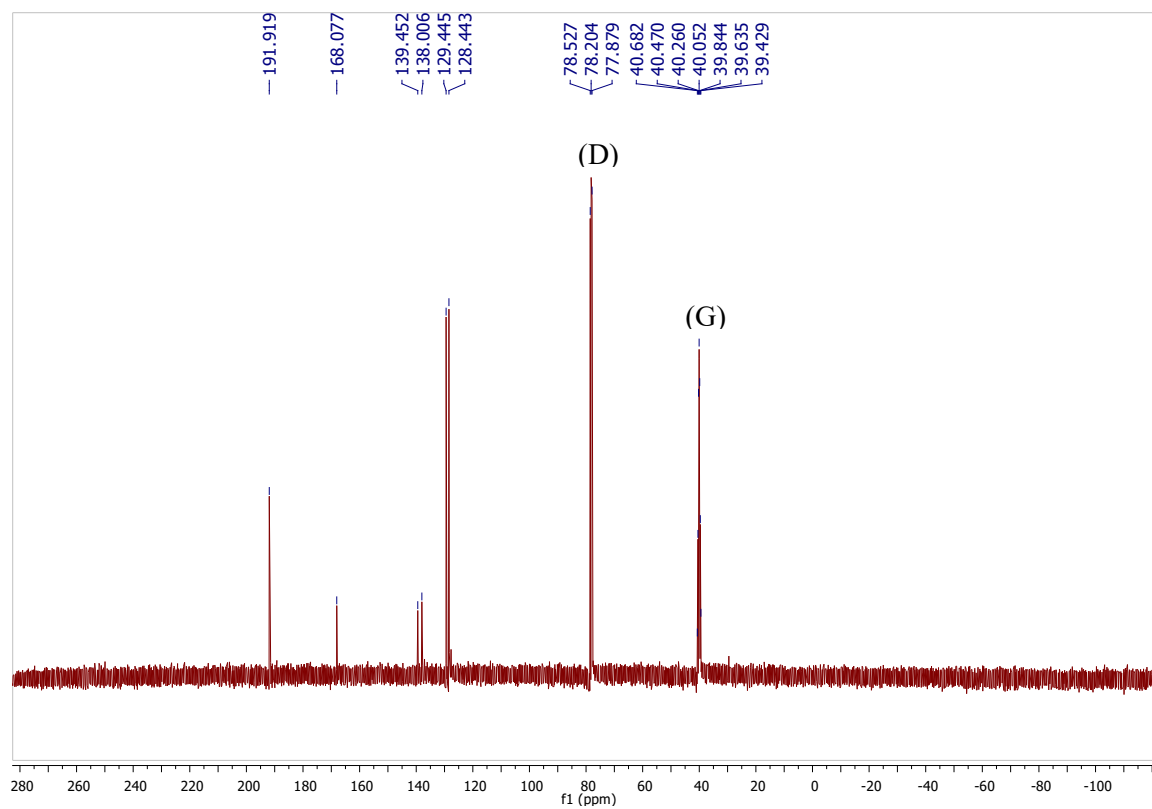

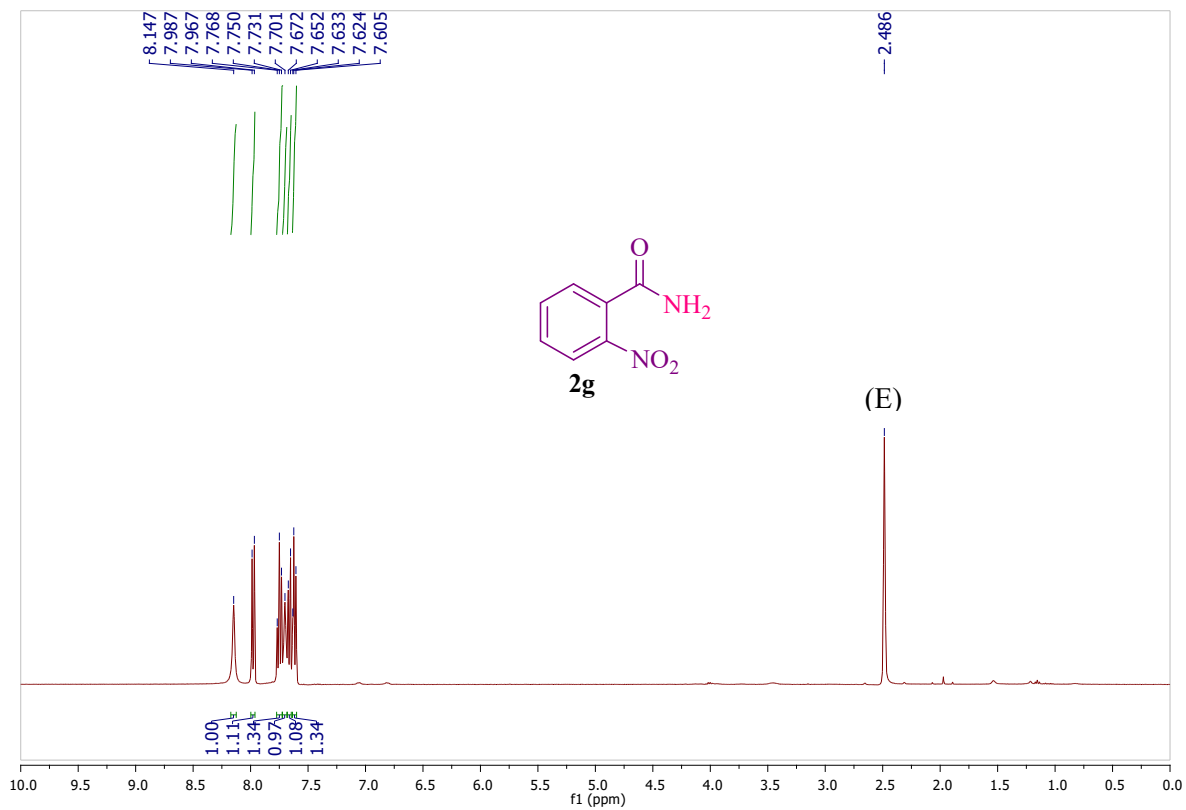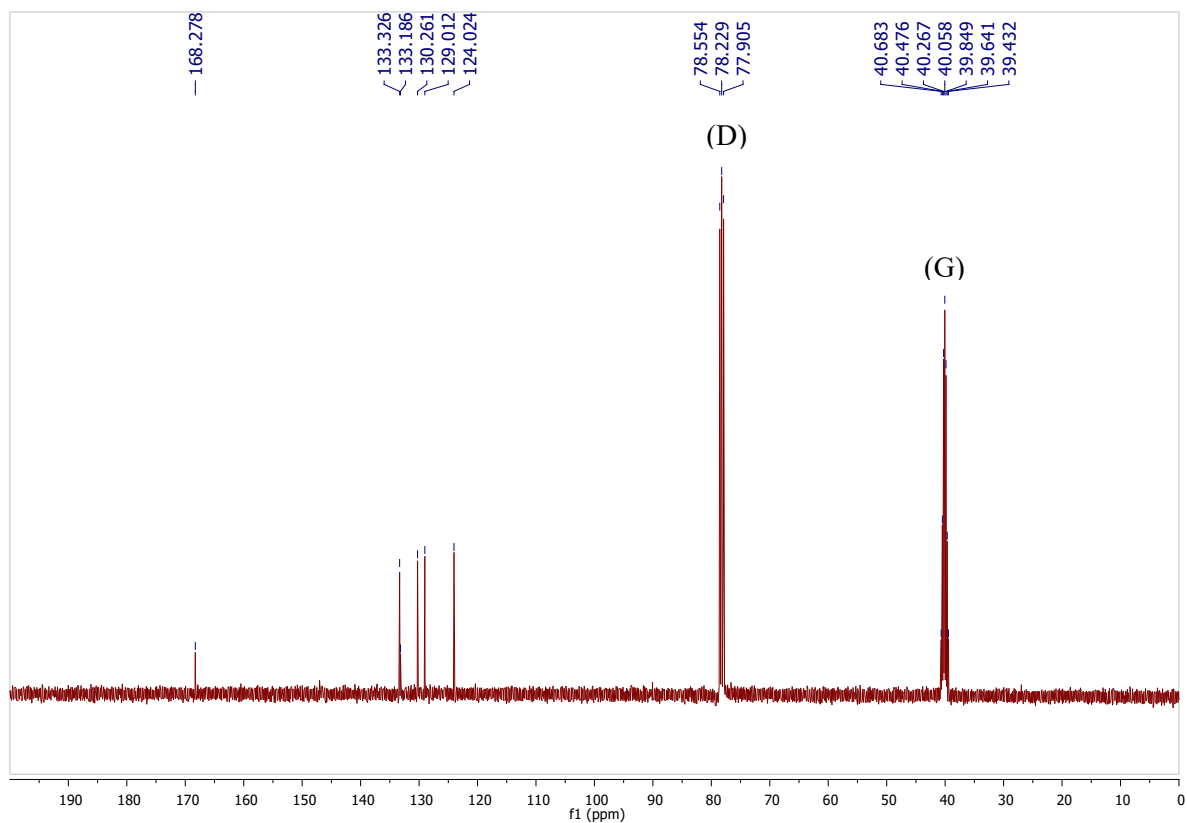

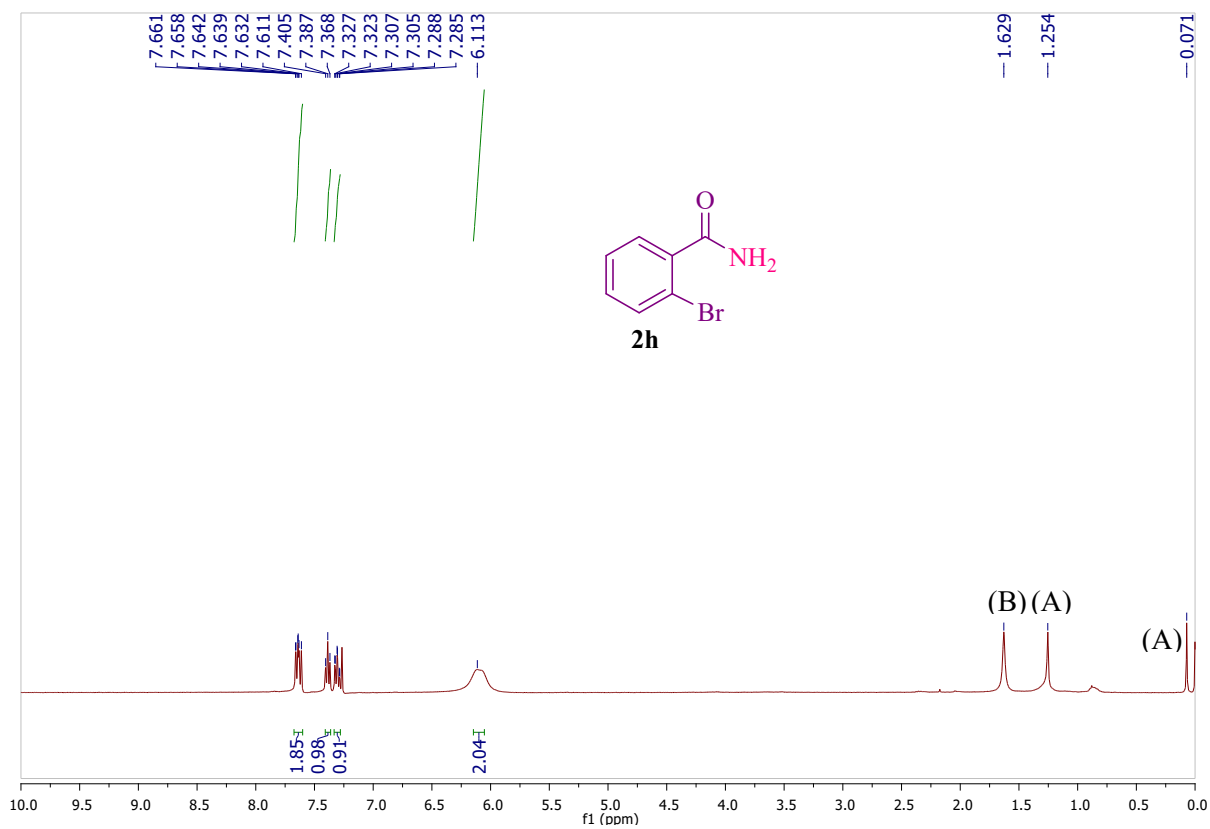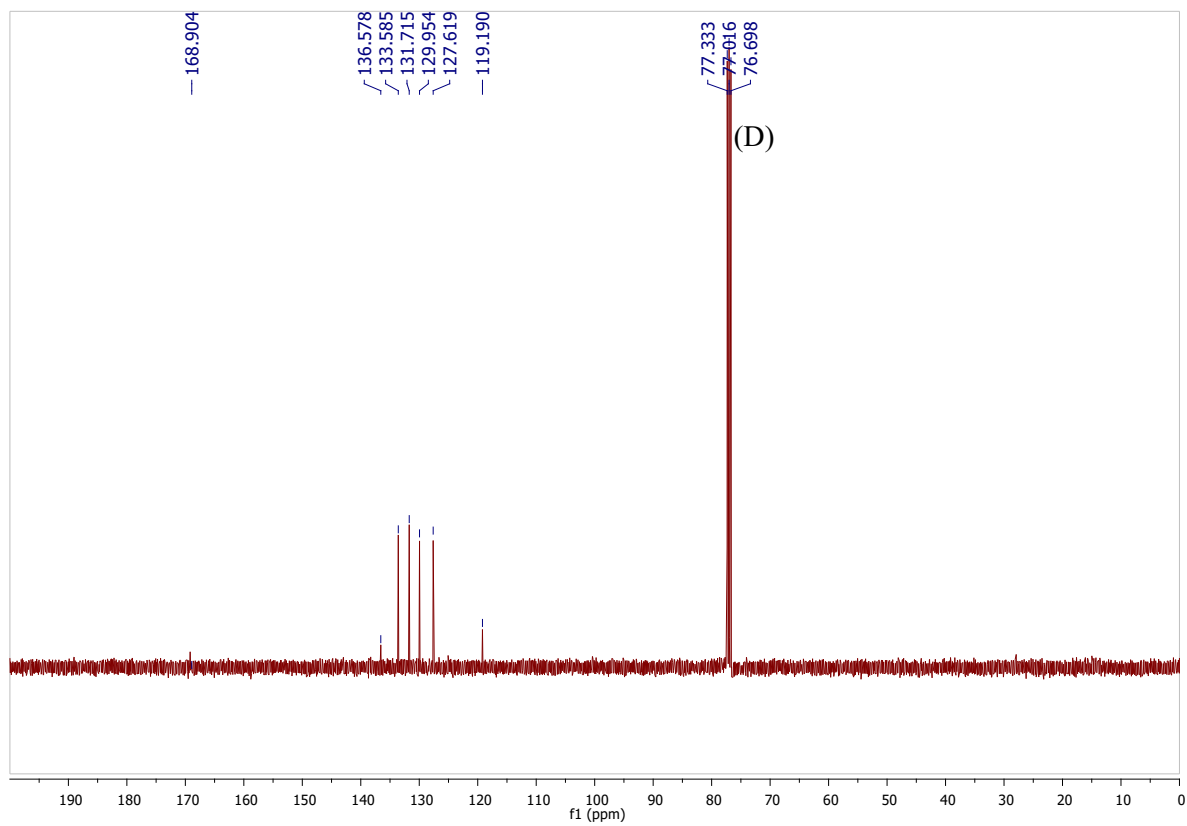

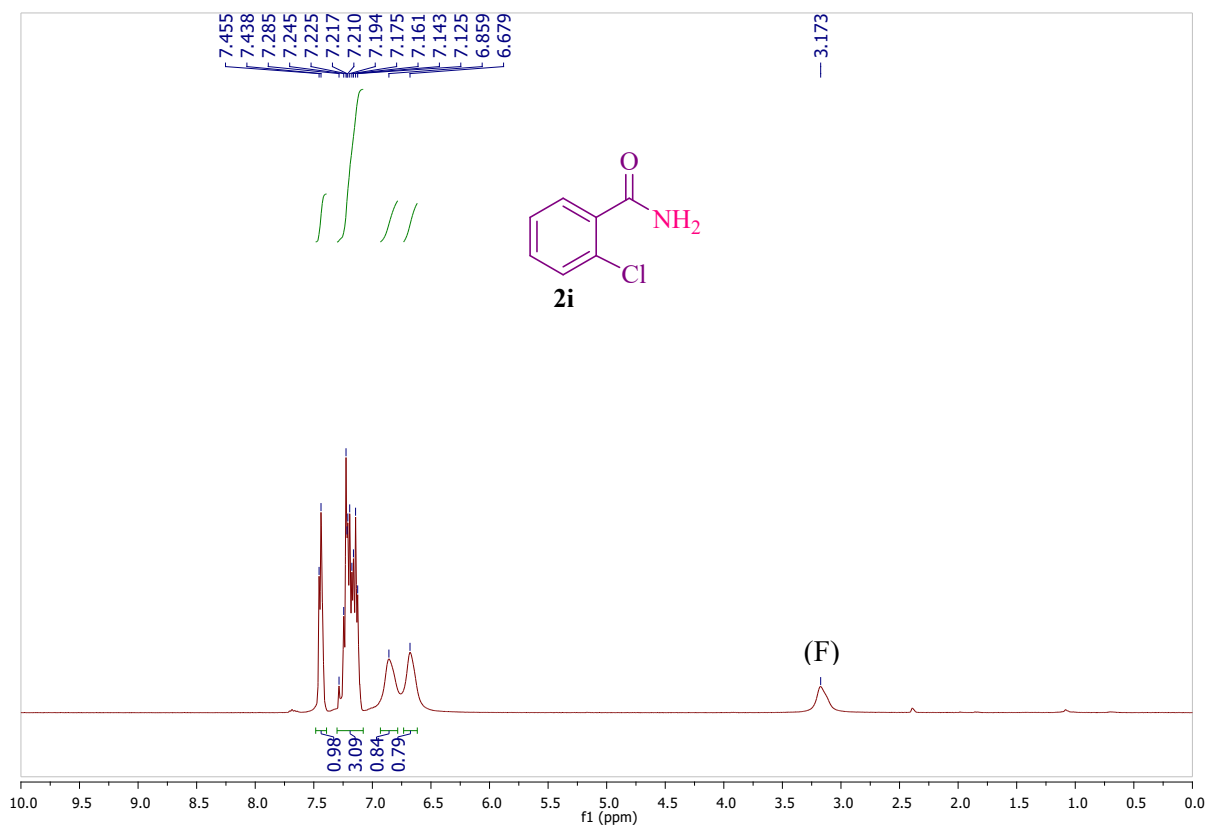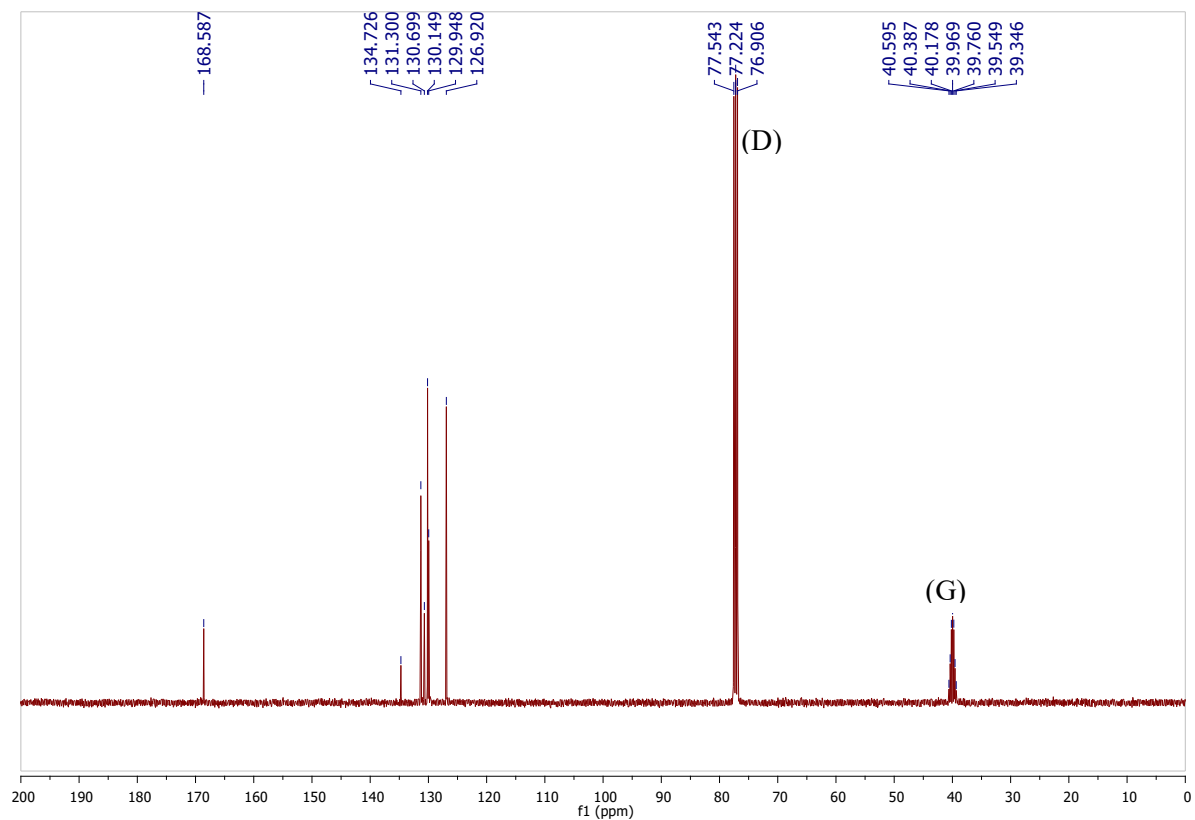

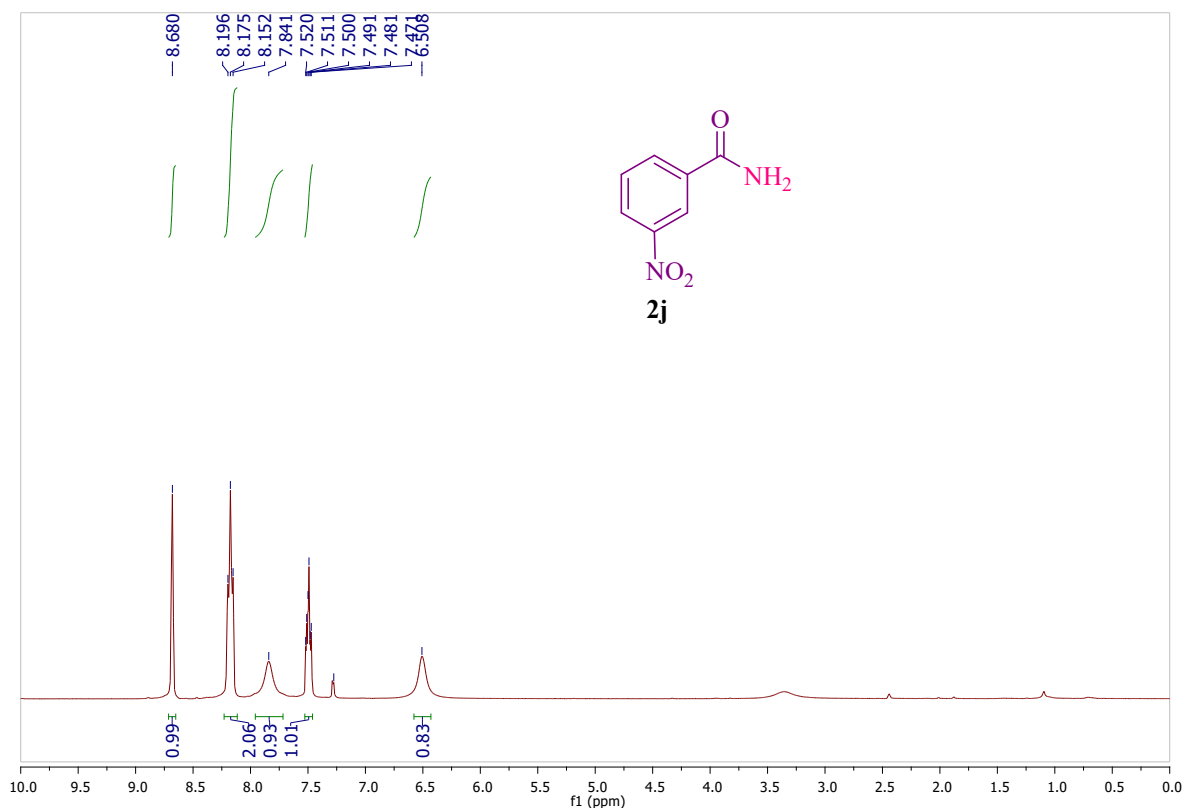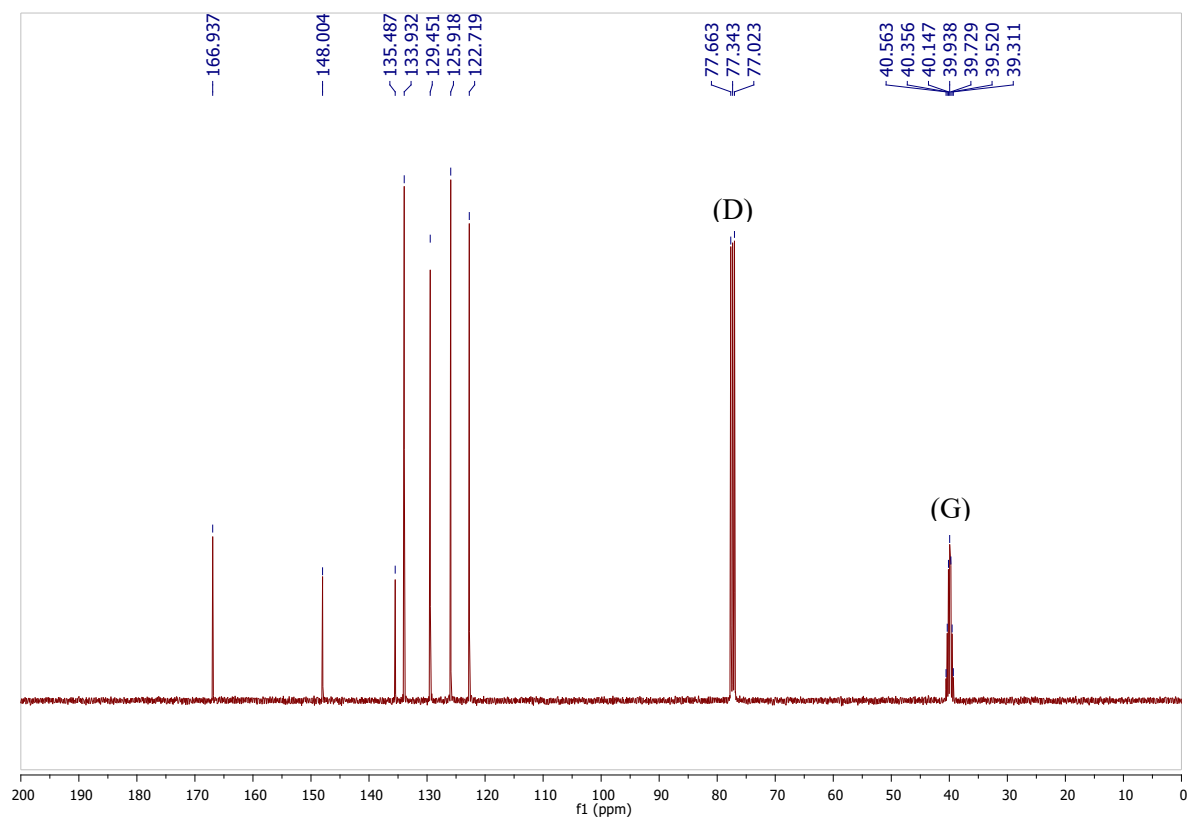

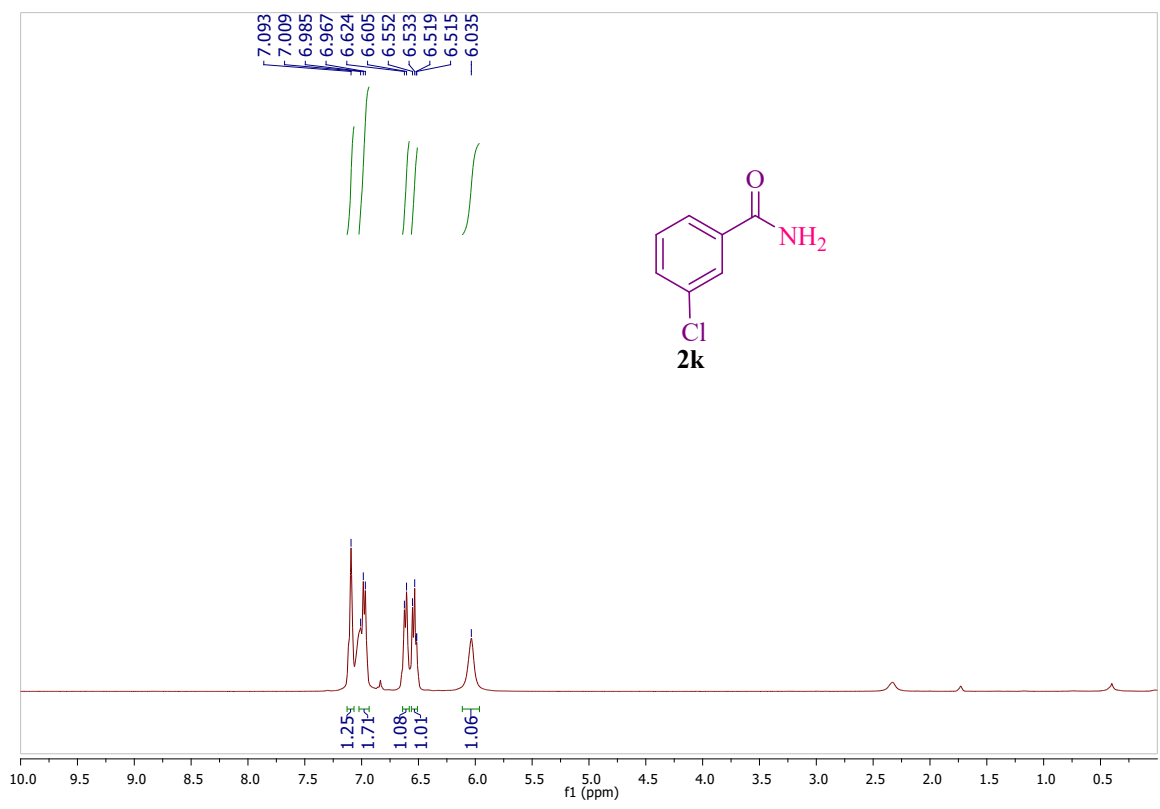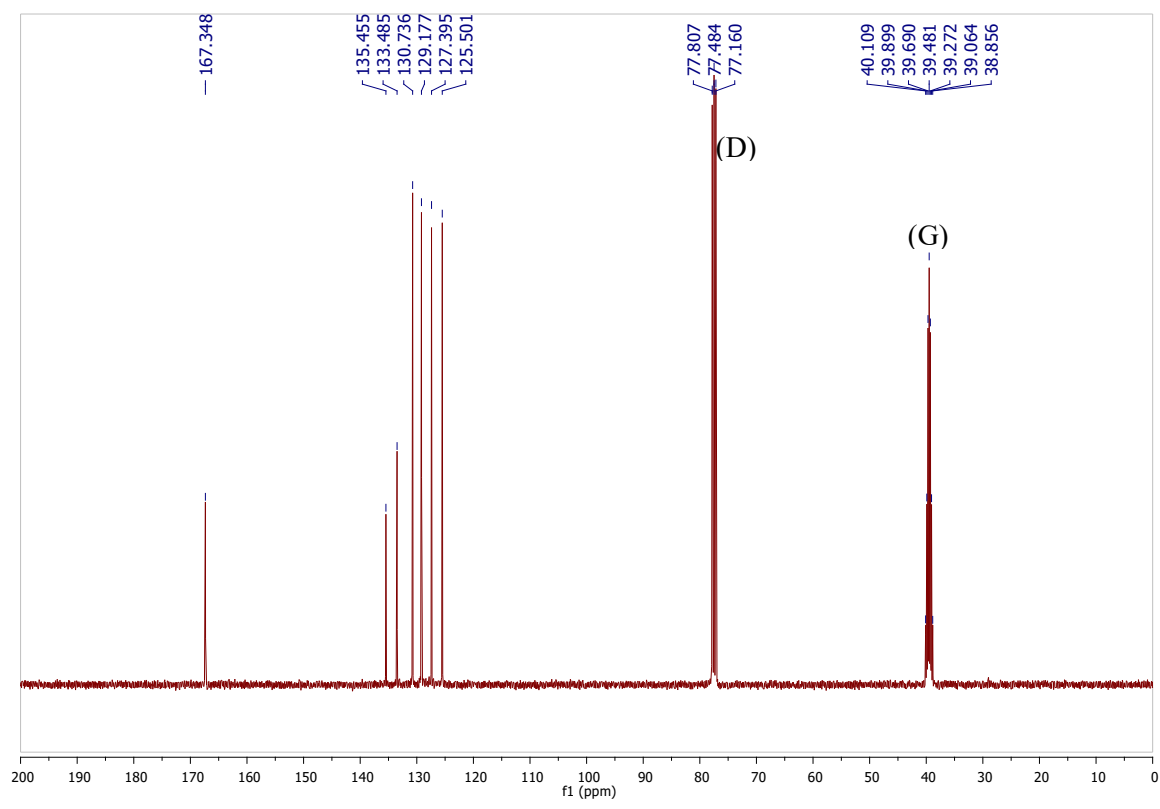



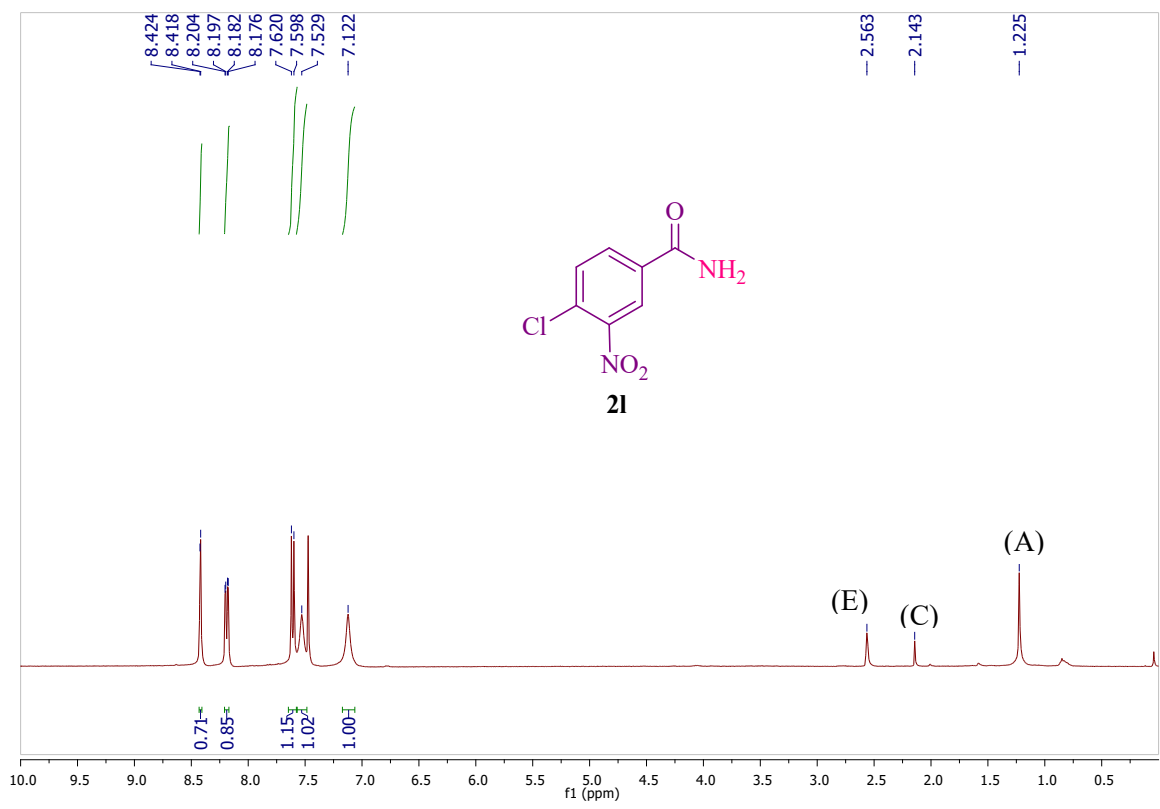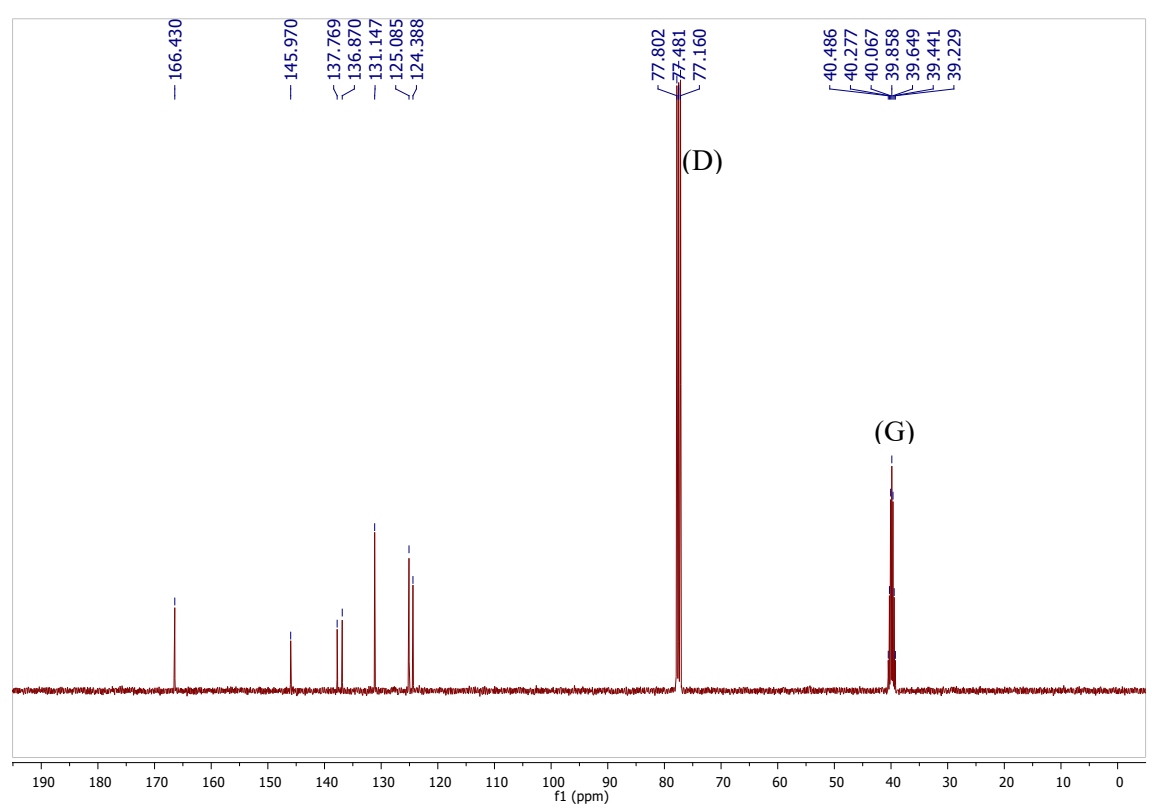

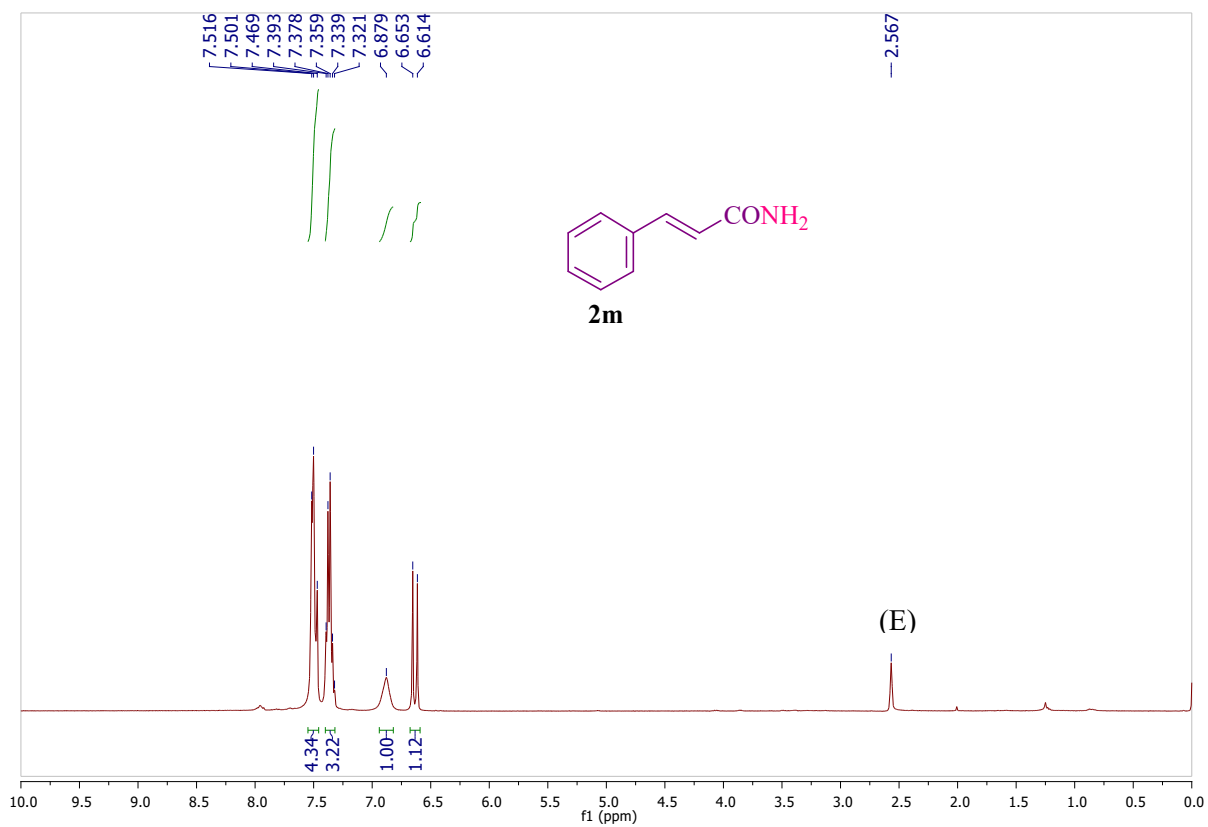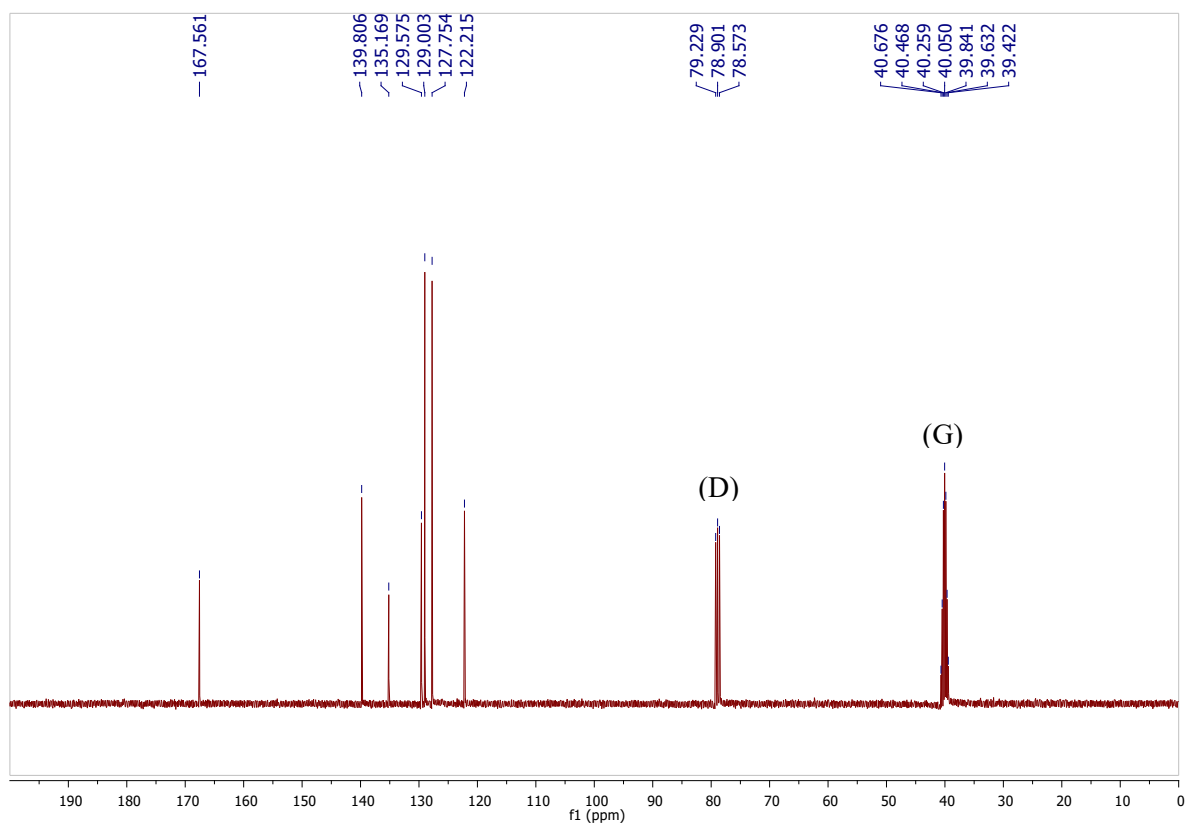

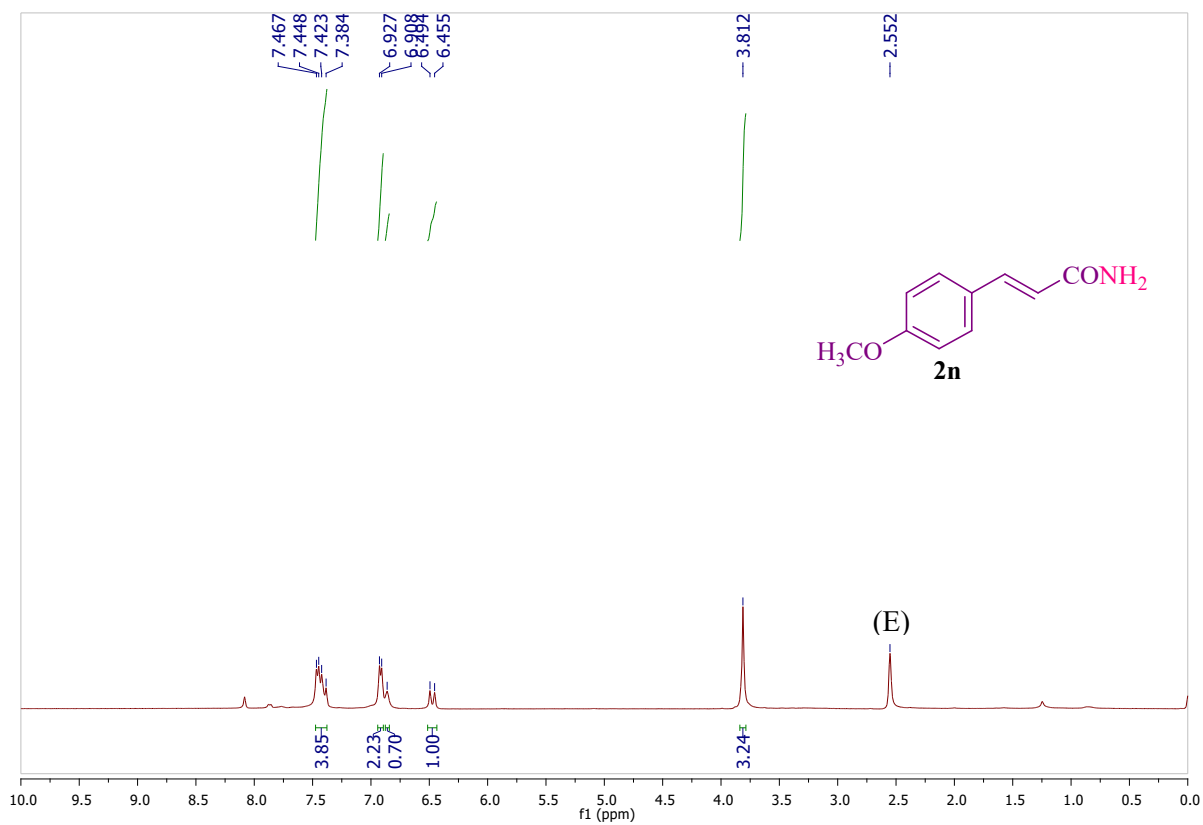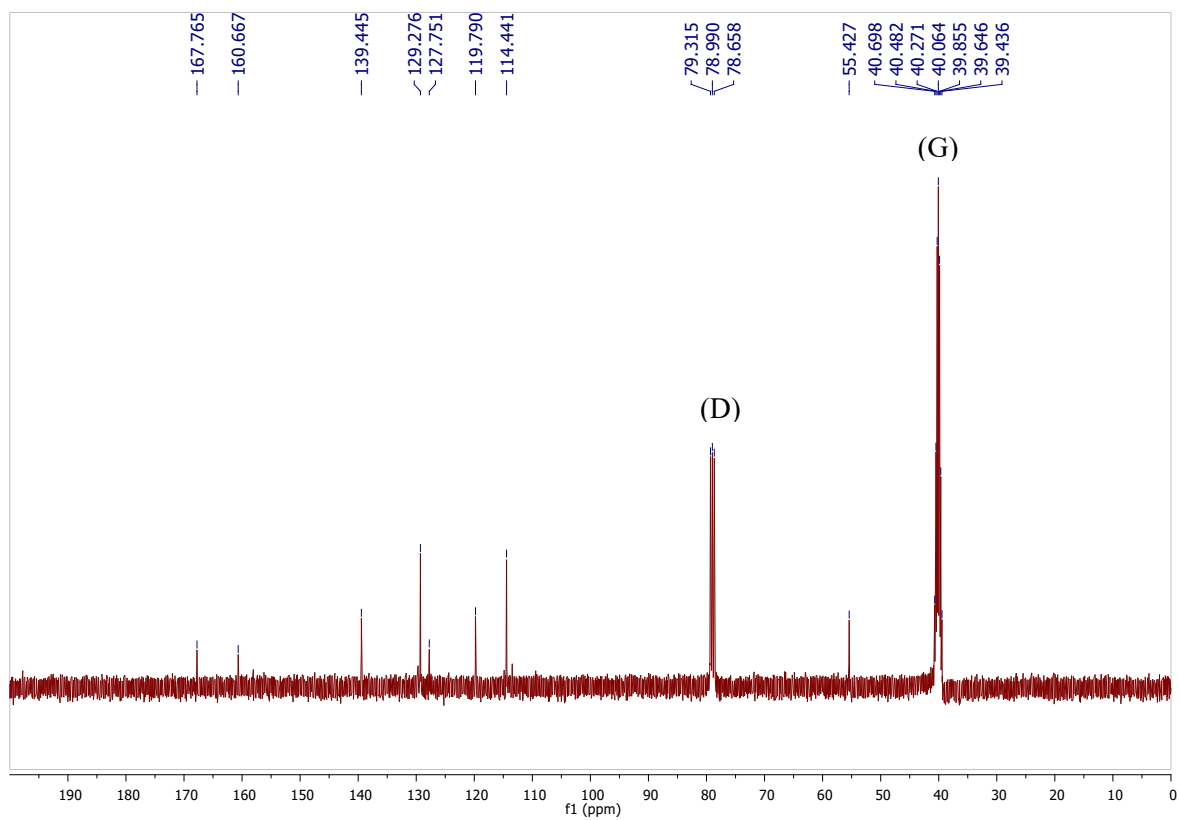

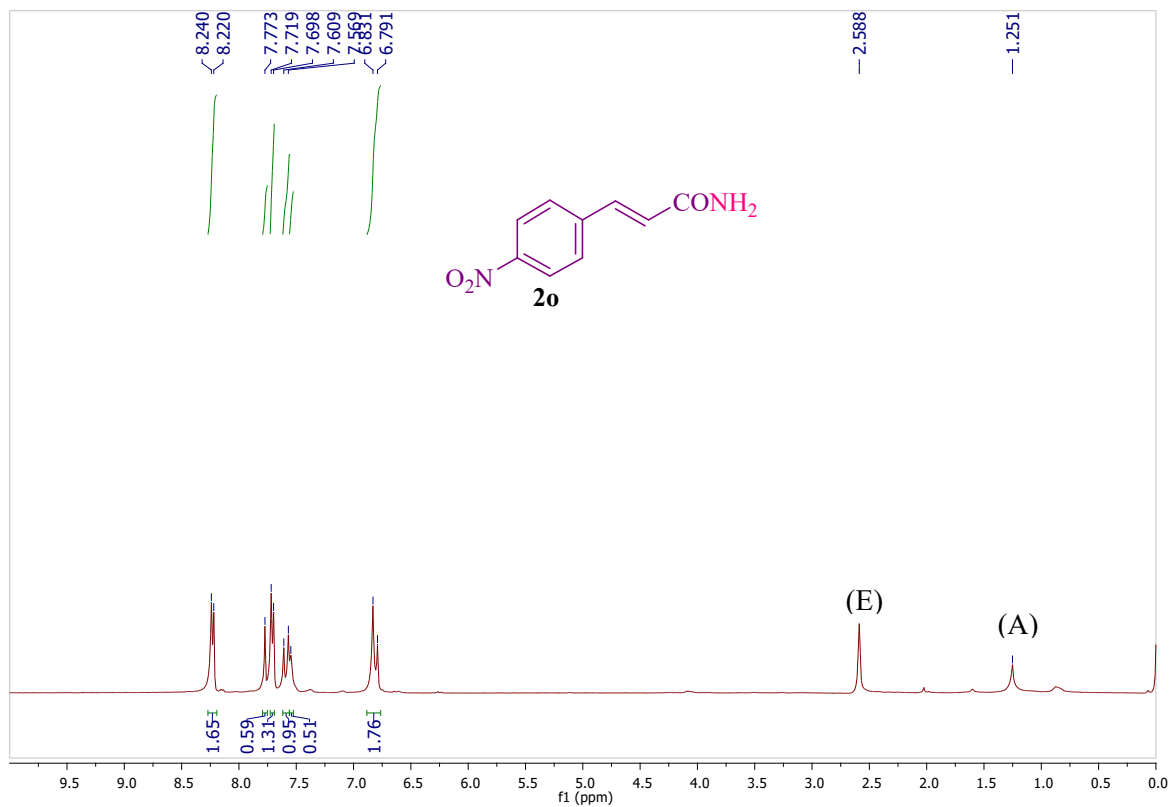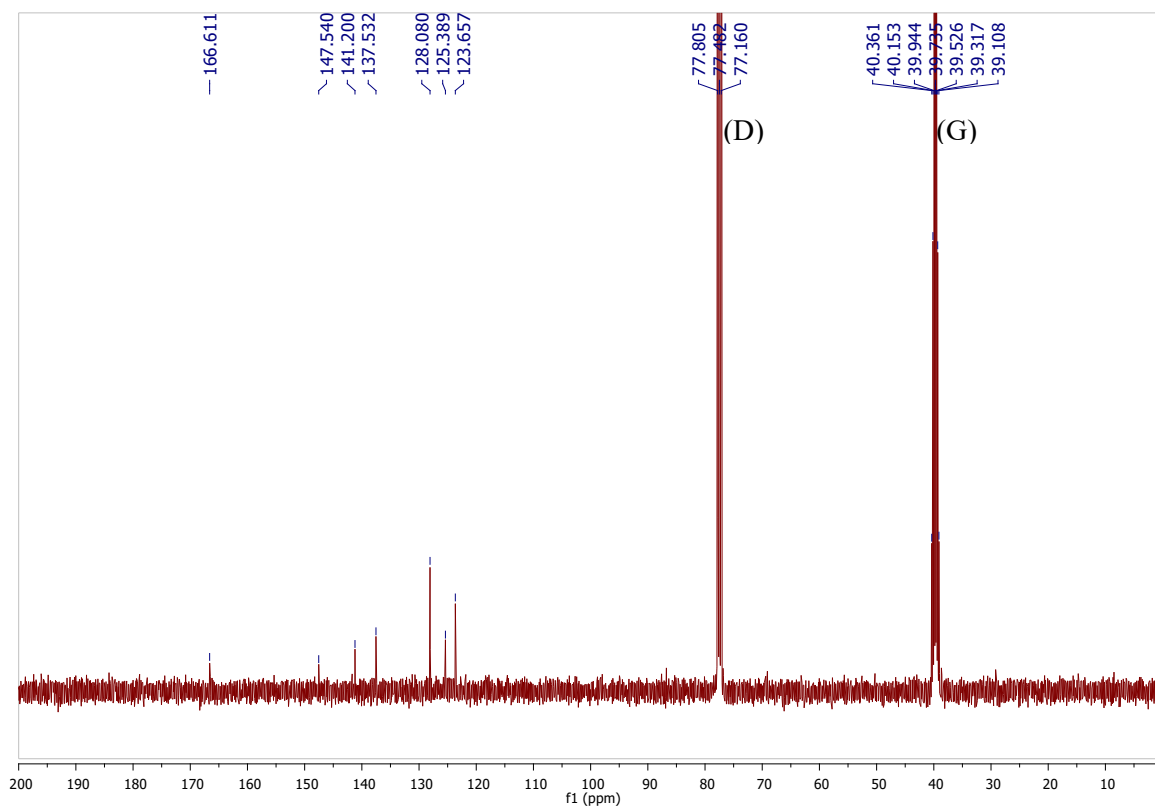

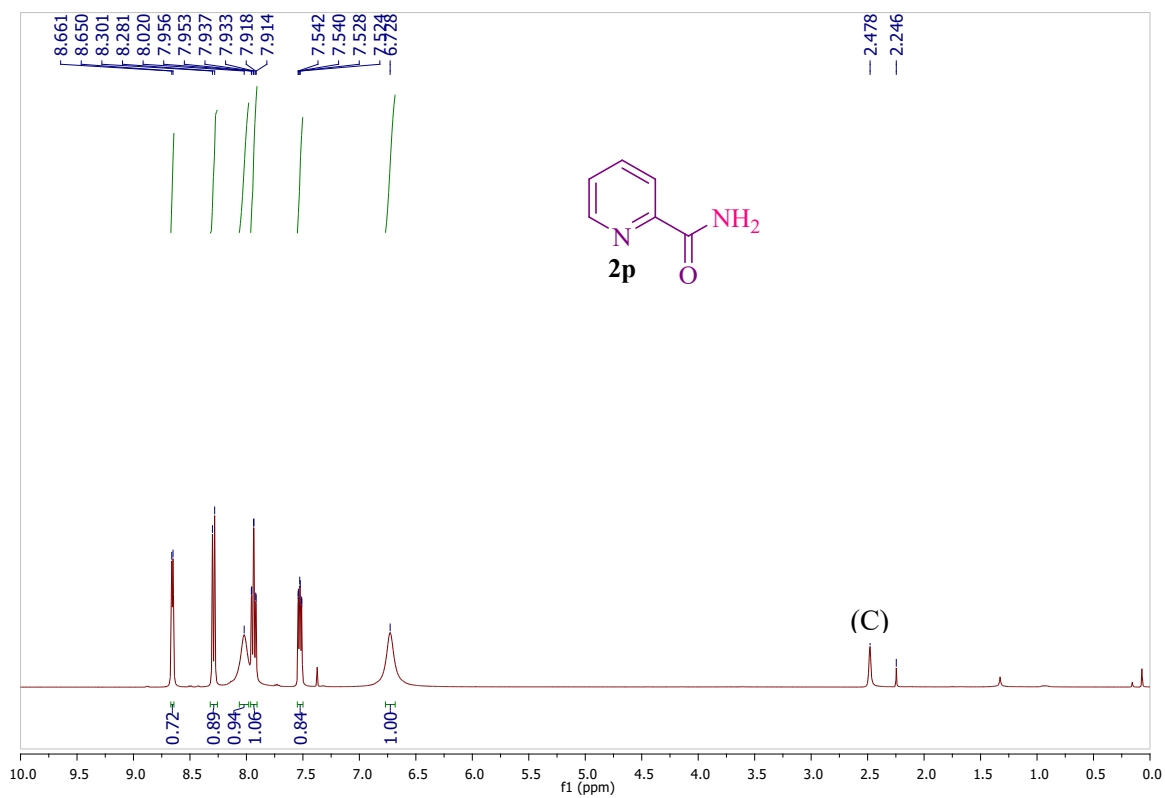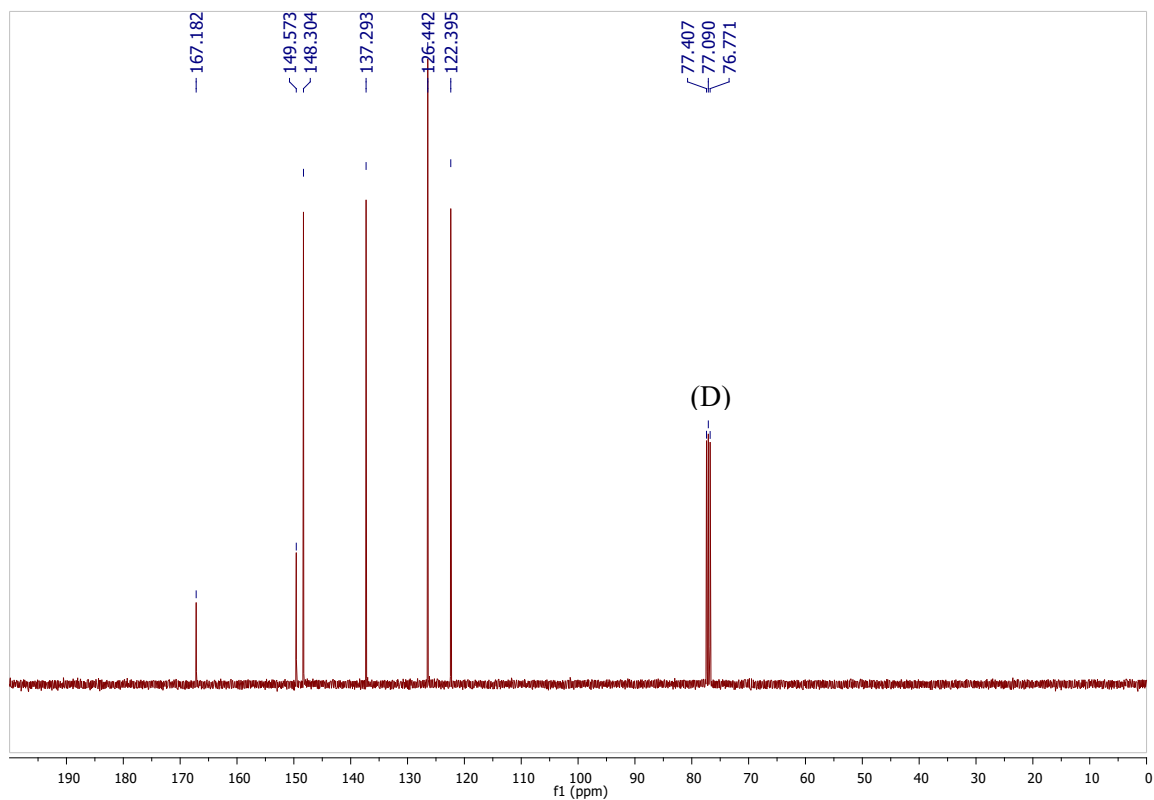

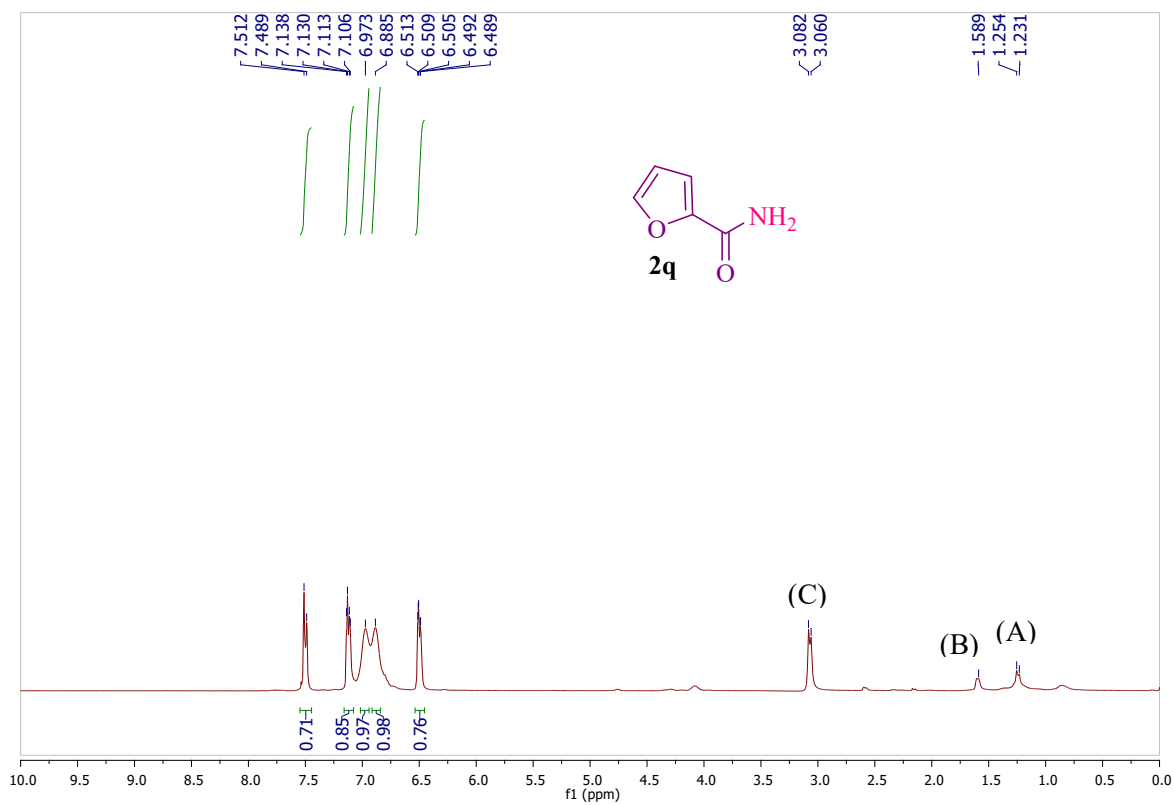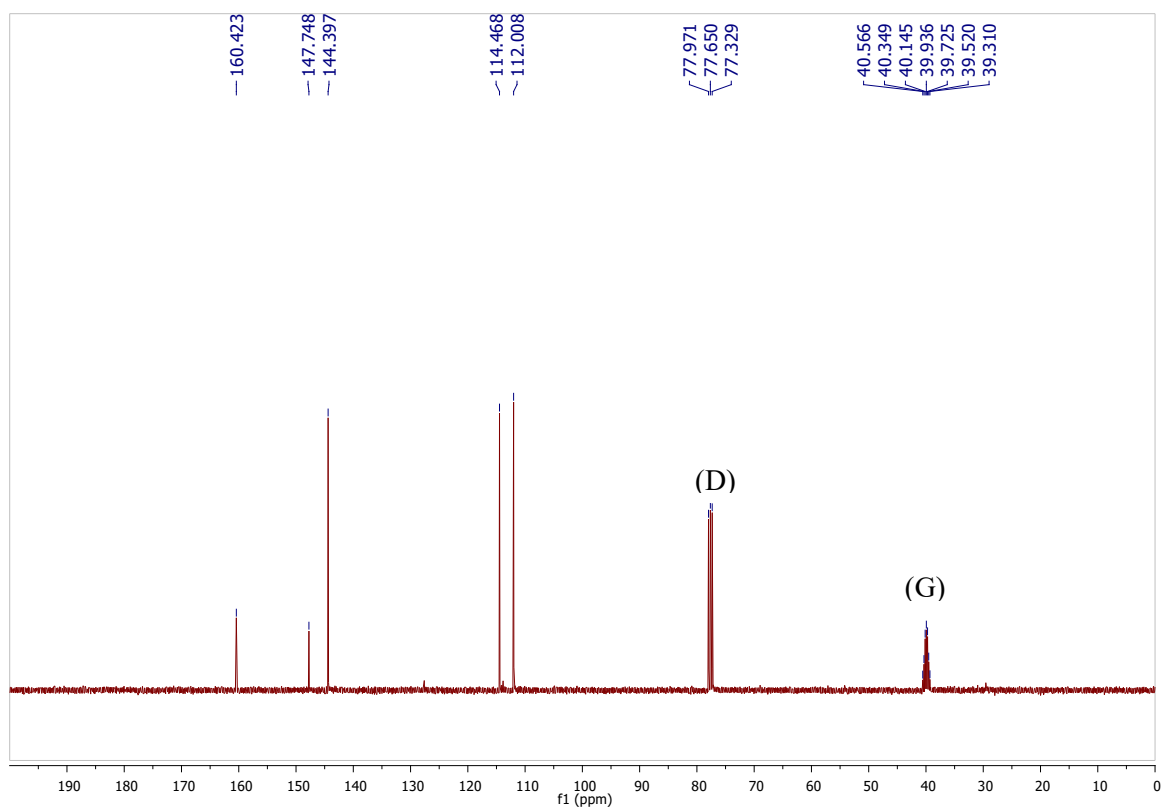

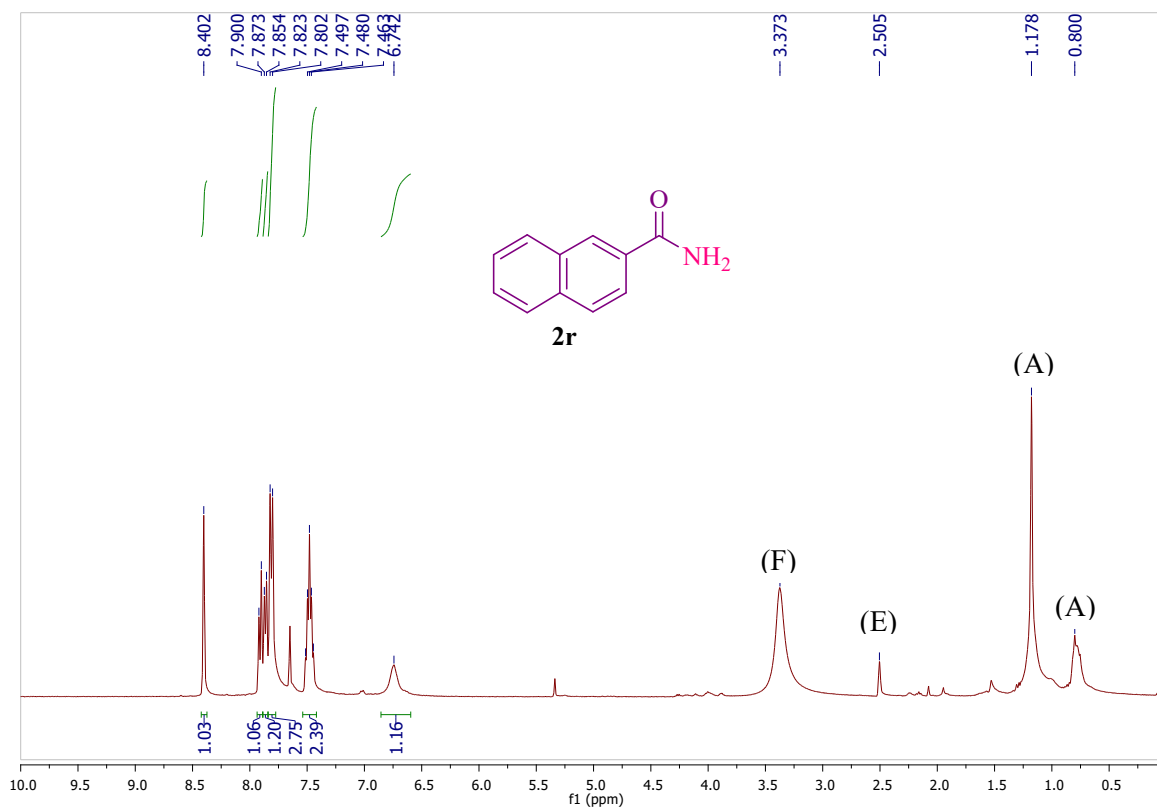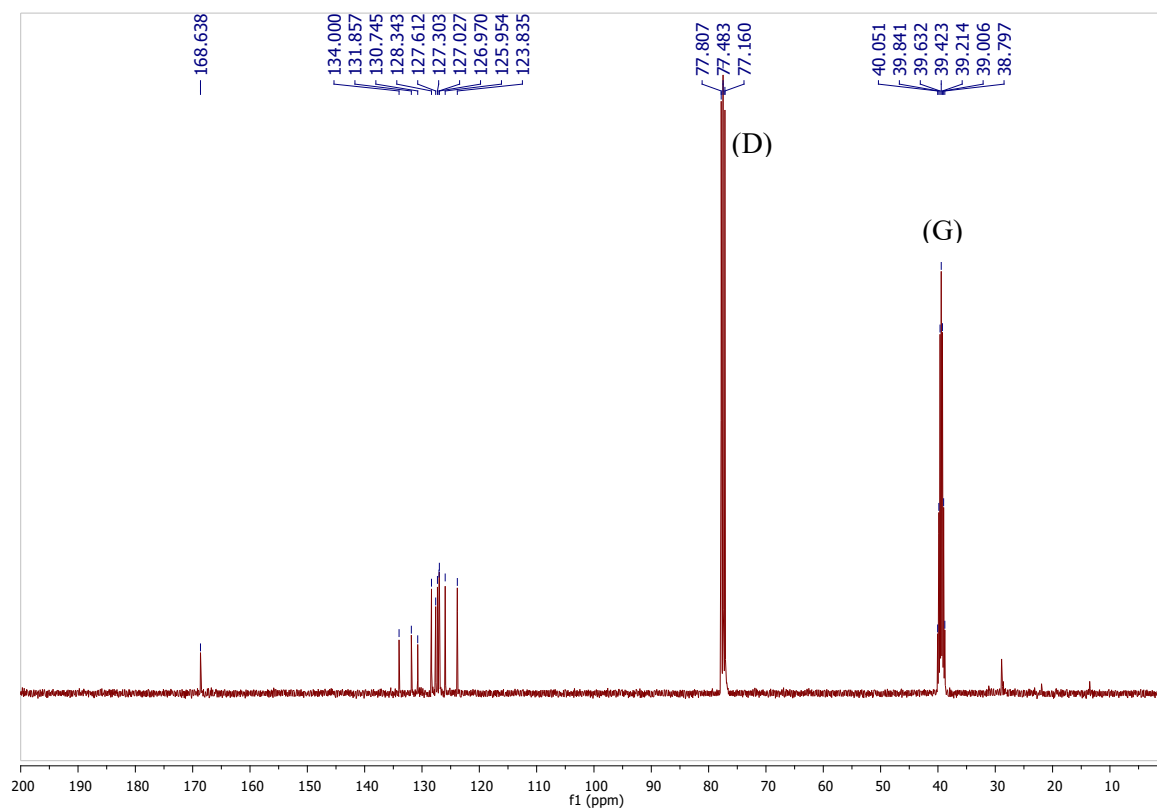

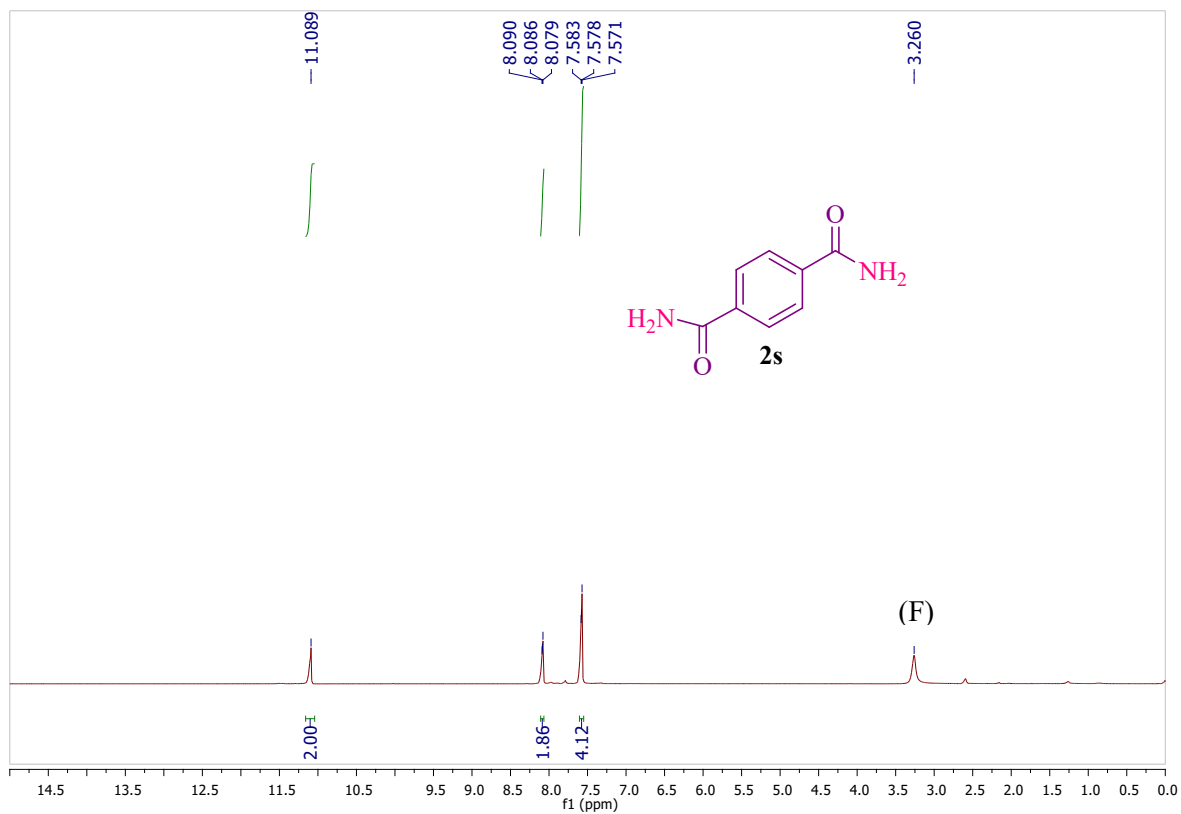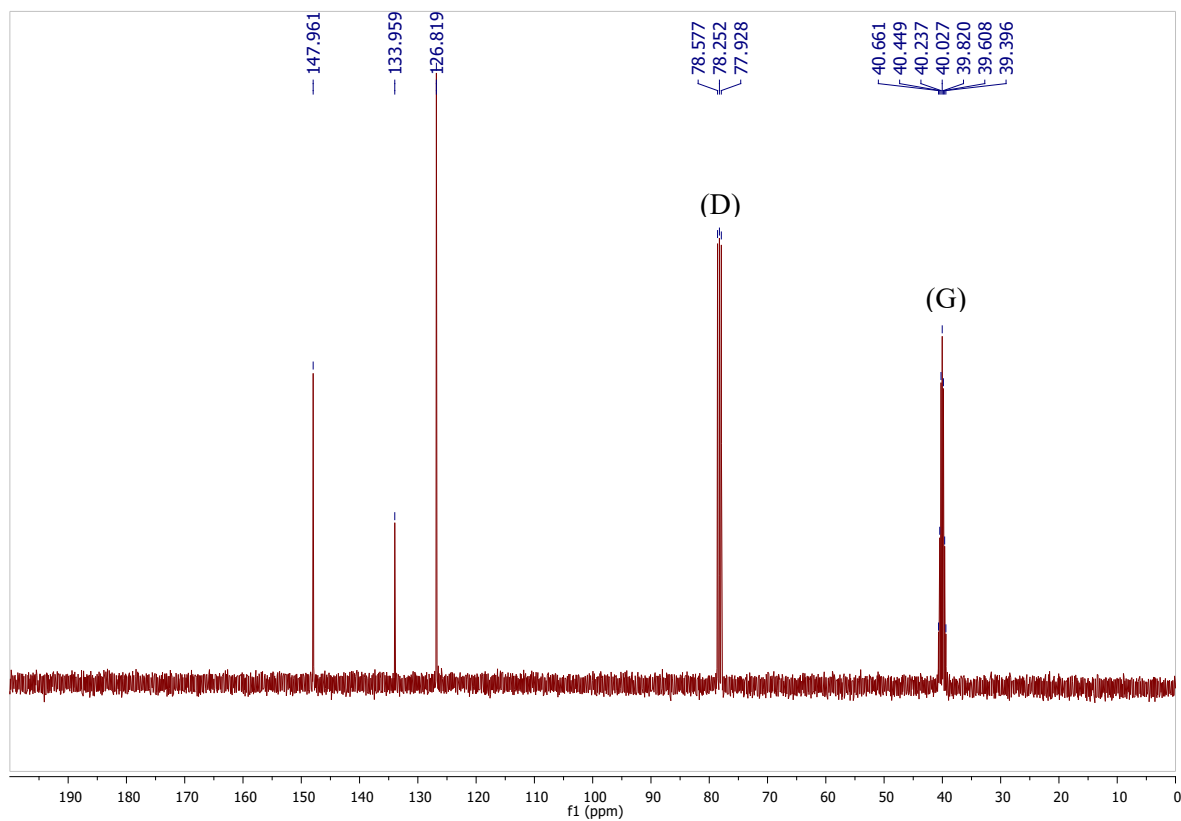



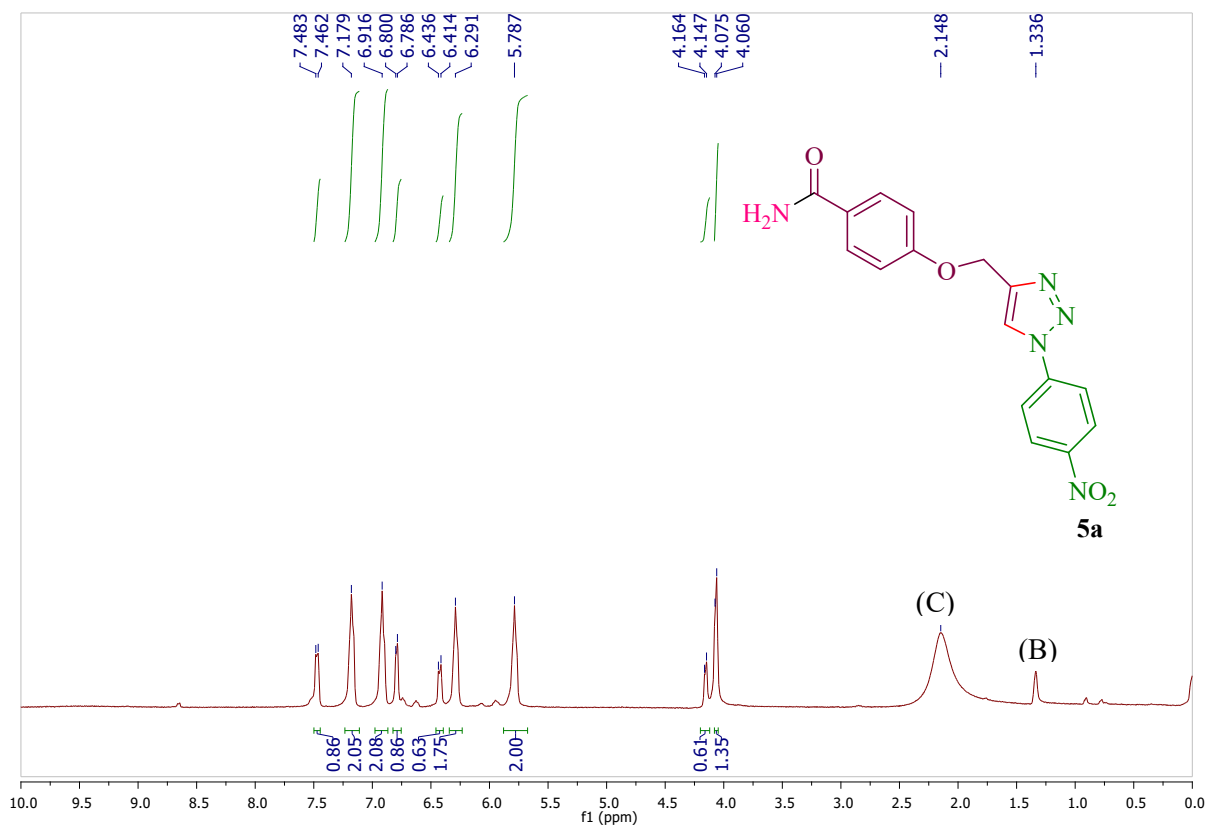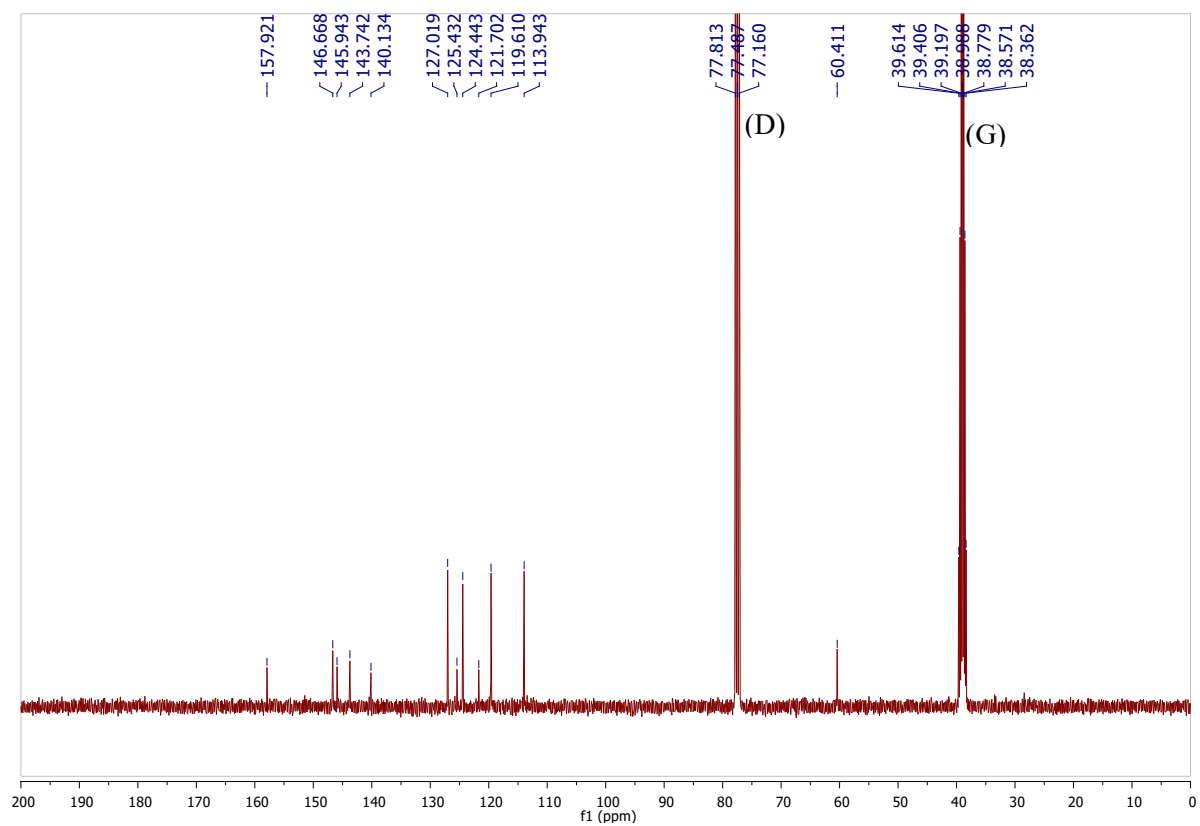

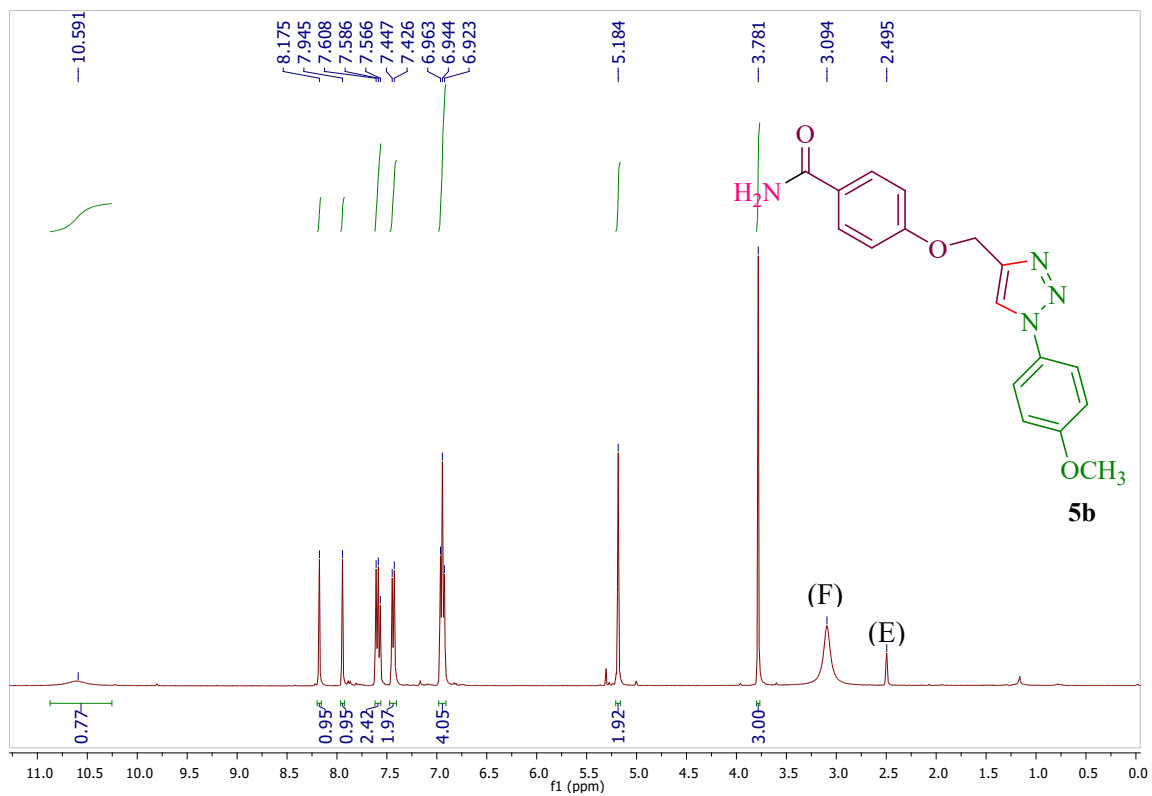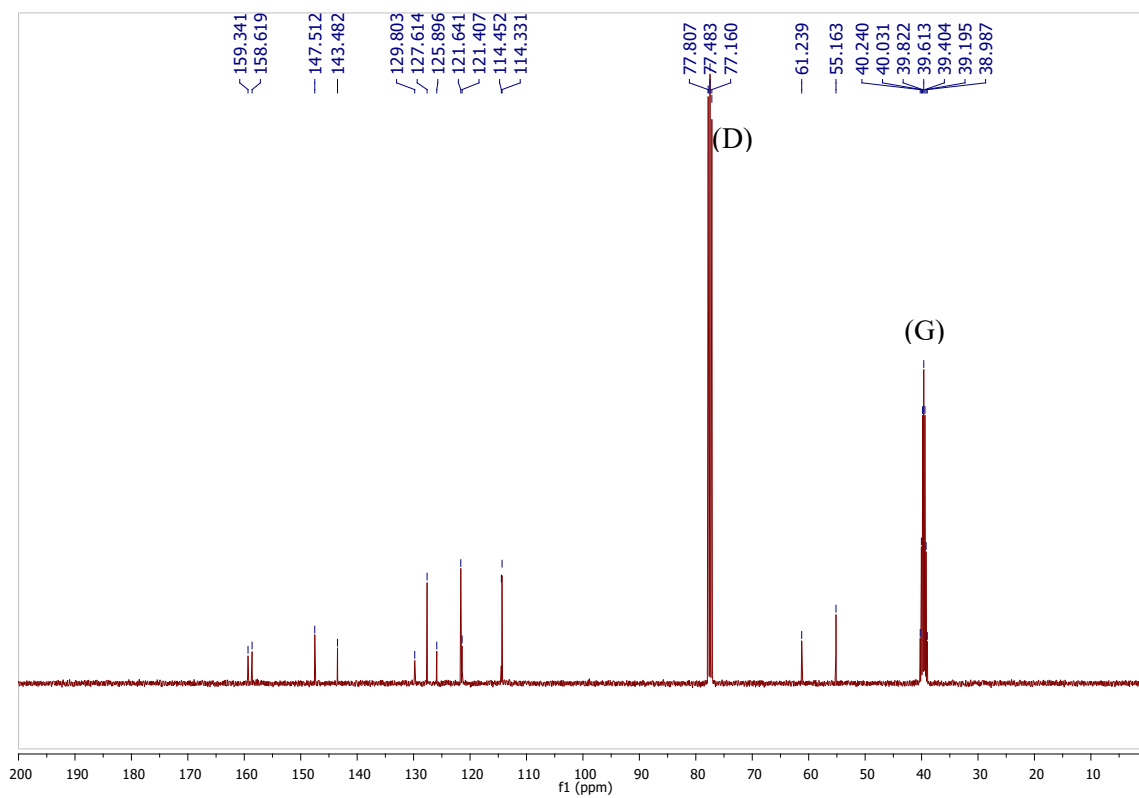

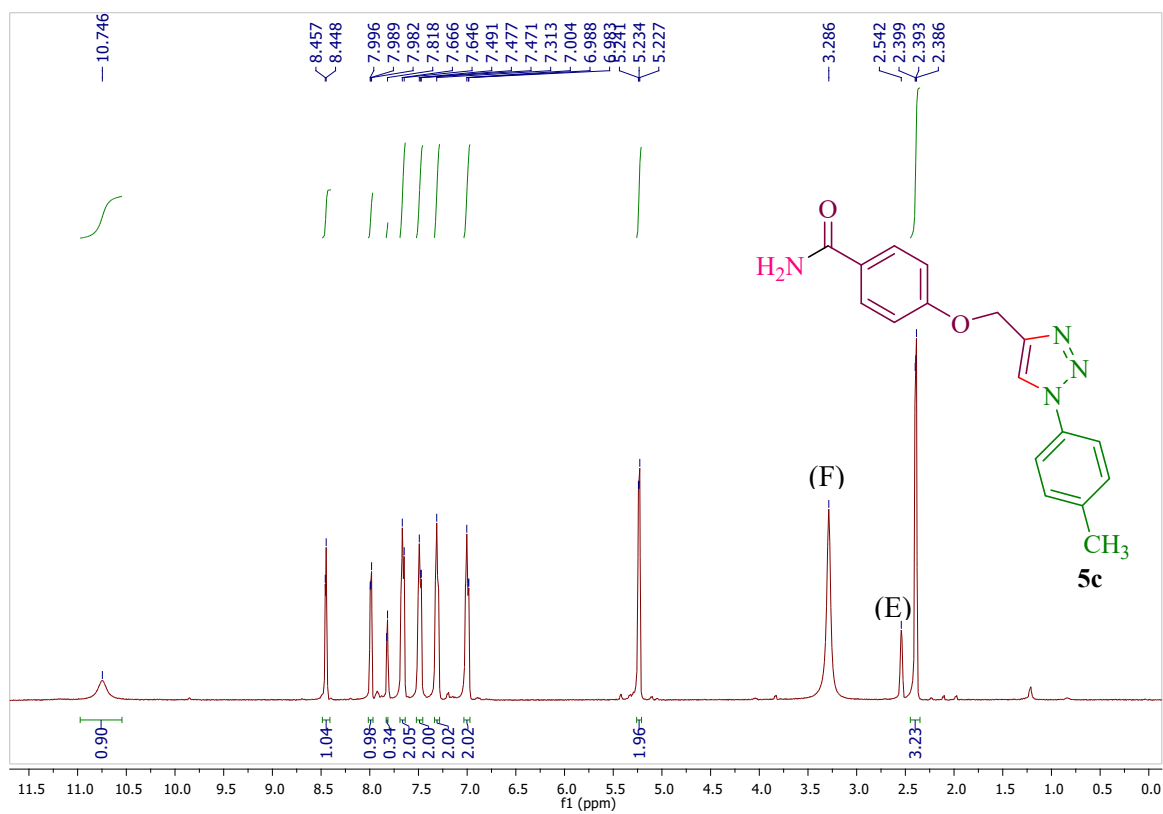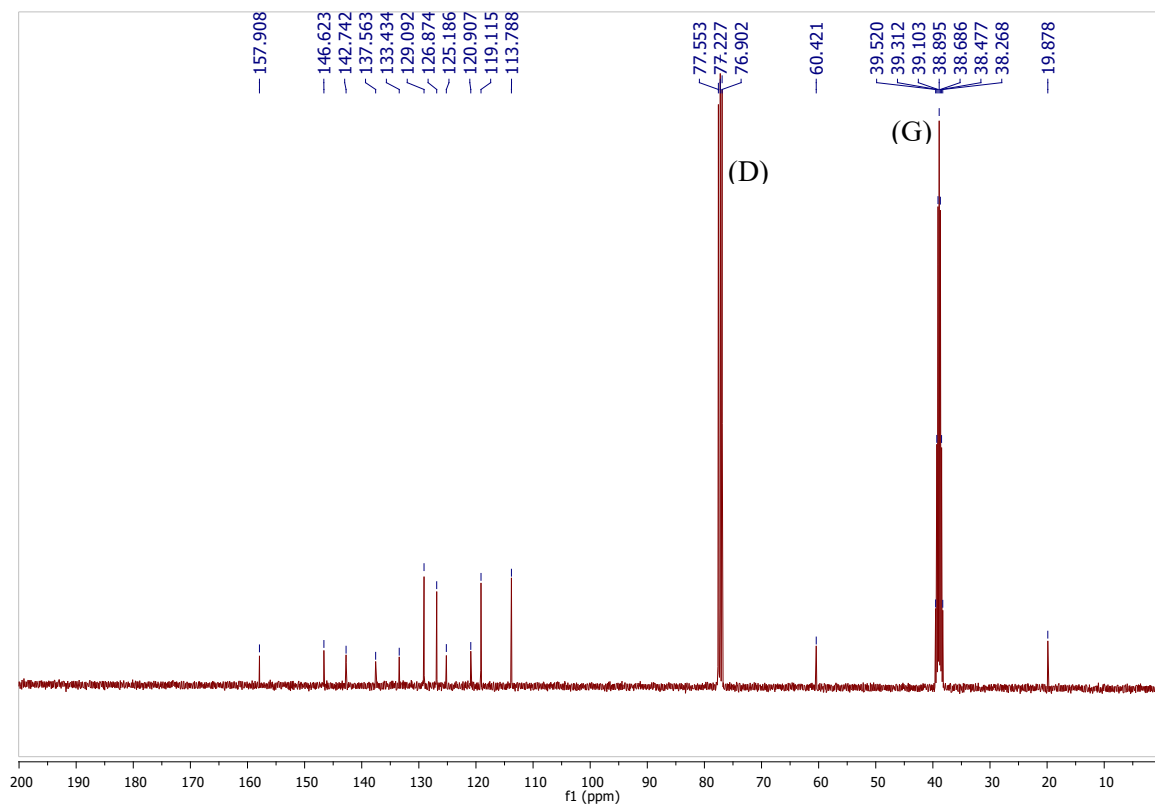

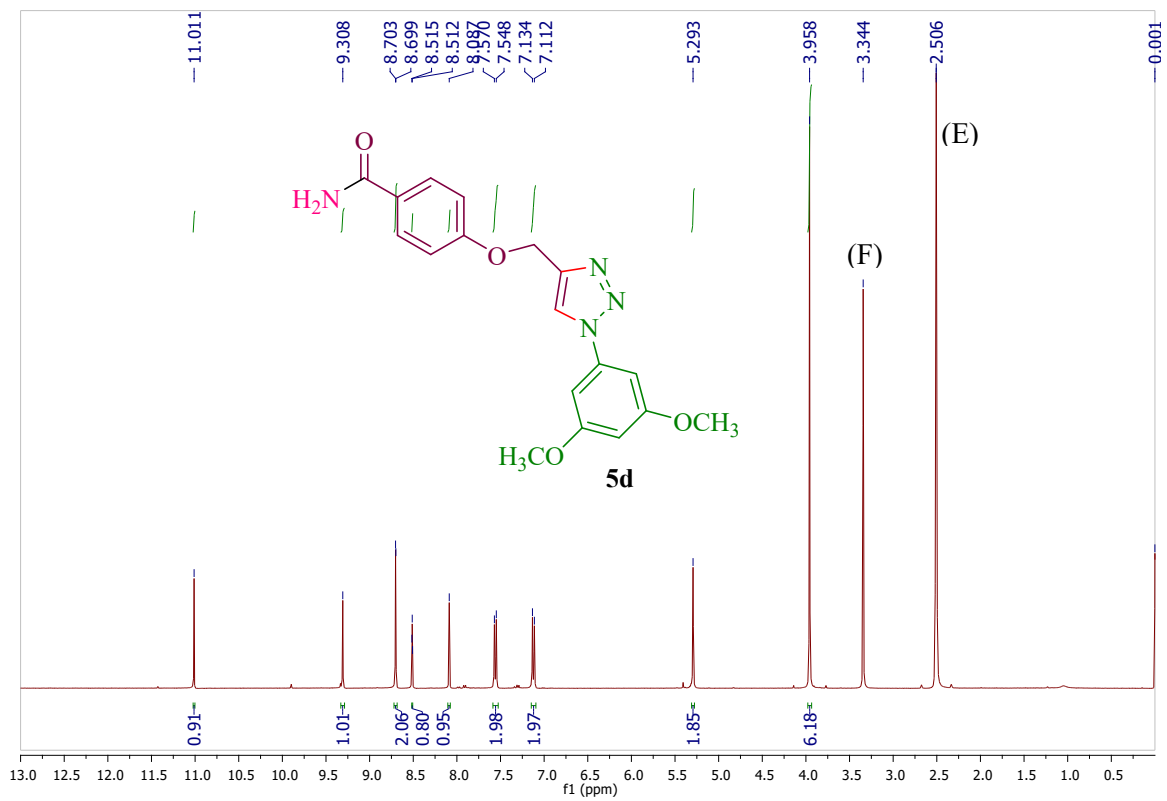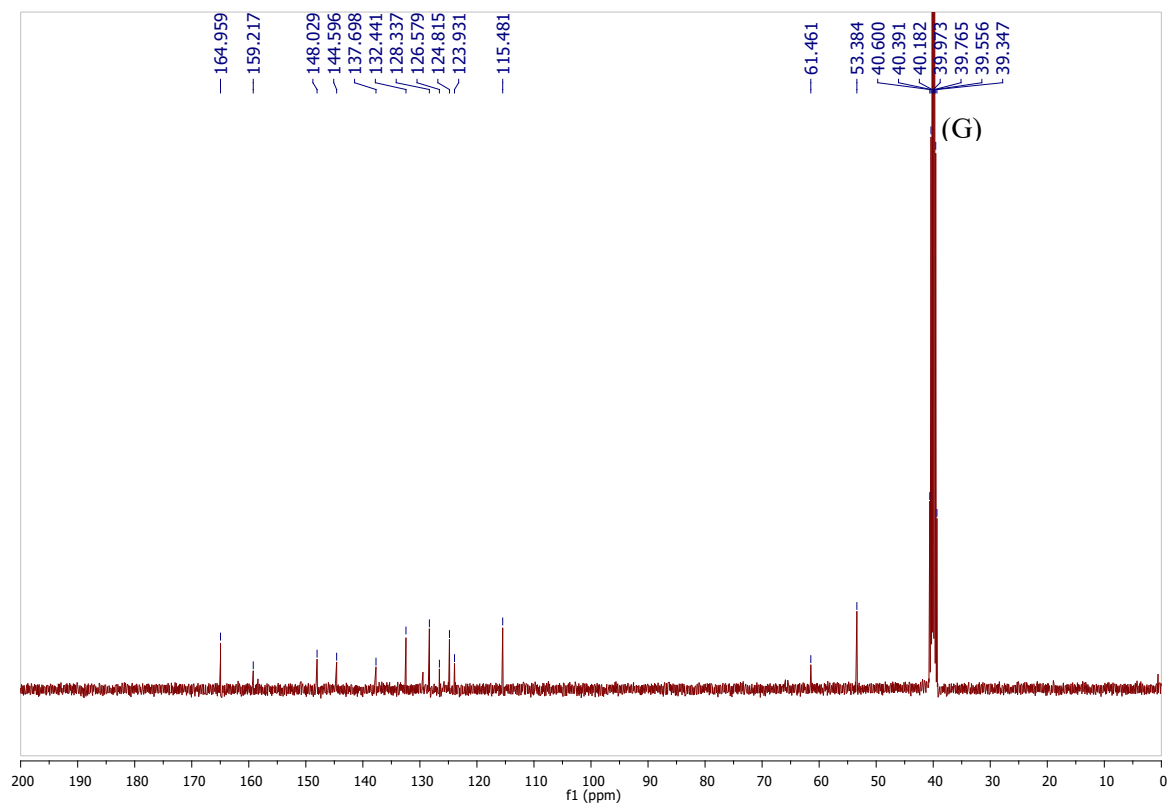

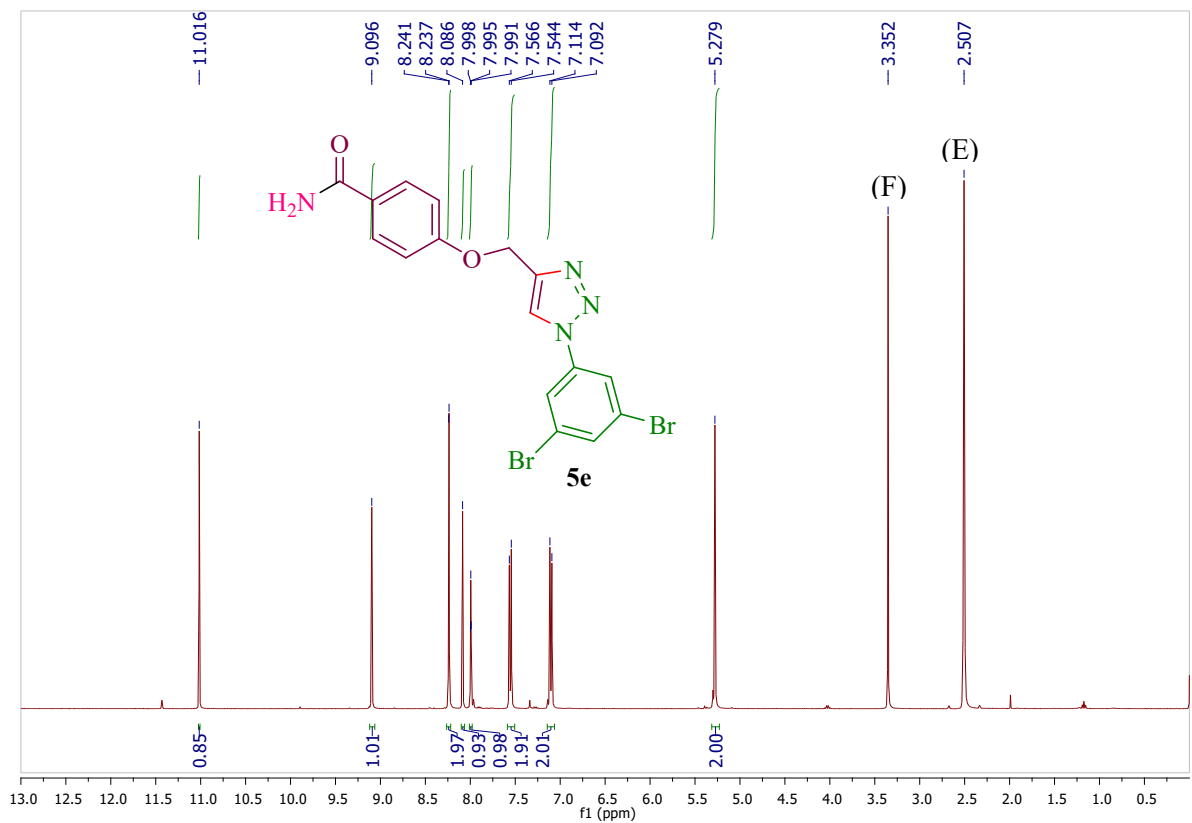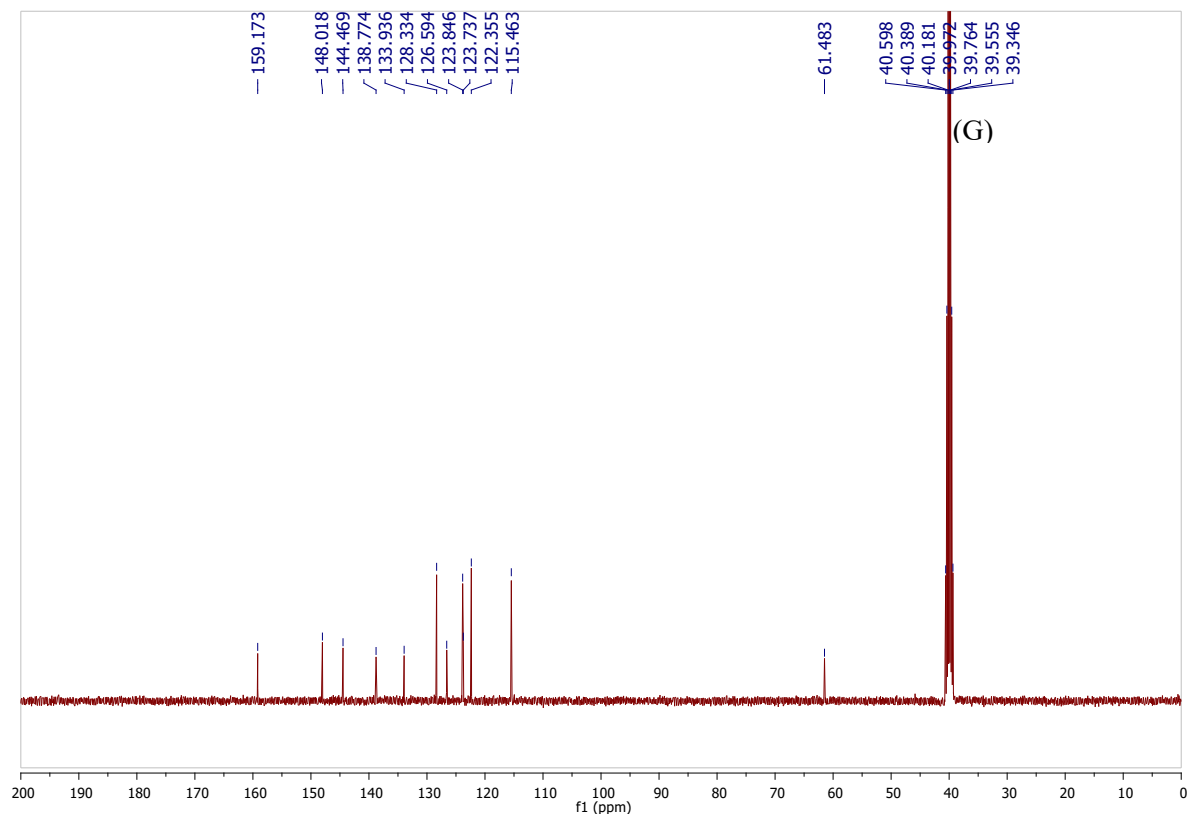

Supplement: d2nj04090e1.pdf [file d2nj04090e1.pdf]
